# Supplementary material for: Generation of iPSC-Derived Human Peripheral Sensory Neurons Releasing Substance P Elicited by TRPV1 Agonists
Source: Front Mol Neurosci. 2018 Aug 22;11:277. doi: 10.3389/fnmol.2018.00277 (PMC6113370; doi:10.3389/fnmol.2018.00277)
Supplement: Supplementary file 10 [file Data_Sheet_1.xlsx]

## Sheet: Figure 2
Row	Column	Number of Analysed Fields	Nuclei - Number of Objects	Nuclei Selected - Number of Objects	Nuclei Selected - Number of Marker Positive Objects	Cell Type	Plate	Marker
2	2	35	302	266	258.02	75% HEKn Medium	1	TRPV1
2	4	35	353	316	306.52	75% HEKn Medium	1	TRPV1
2	5	35	278	249	241.53	75% HEKn Medium	1	TRPV1
2	6	35	234	214	207.58	75% HEKn Medium	1	TRPV1
2	7	35	245	222	215.34	75% HEKn Medium	1	TRPV1
2	8	35	286	269	235.375	75% HEKn Medium	1	BRN3A
3	2	35	341	304	266	75% HEKn Medium	1	BRN3A
3	3	35	268	244	213.5	75% HEKn Medium	1	BRN3A
3	4	35	221	196	171.5	75% HEKn Medium	1	BRN3A
3	5	35	280	252	220.5	75% HEKn Medium	1	BRN3A
3	6	35	290	267	235.227	75% HEKn Medium	1	Peripherin
3	7	35	265	239	210.559	75% HEKn Medium	1	Peripherin
3	8	35	304	287	252.847	75% HEKn Medium	1	Peripherin
4	2	35	279	261	229.941	75% HEKn Medium	1	Peripherin
4	3	35	285	262	230.822	75% HEKn Medium	1	Peripherin
4	4	35	248	235	0	75% HEKn Medium	1	Islet1
4	5	35	264	239	0	75% HEKn Medium	1	Islet1
4	6	35	309	277	0	75% HEKn Medium	1	Islet1
4	7	35	333	314	0	75% HEKn Medium	1	Islet1
4	8	35	344	314	0	75% HEKn Medium	1	Islet1
Row	Column	Number of Analysed Fields	Nuclei - Number of Objects	Nuclei - Nuclei Selected - Mean per Well		Cell Type	Plate	Marker
2	2	35	180	149	144.53	75% HEKn Medium	2	TRPV1
2	4	35	146	121	117.37	75% HEKn Medium	2	TRPV1
2	5	35	187	157	152.29	75% HEKn Medium	2	TRPV1
2	6	35	197	169	163.93	75% HEKn Medium	2	TRPV1
2	7	35	180	150	145.5	75% HEKn Medium	2	TRPV1
2	8	35	178	143	125.268	75% HEKn Medium	2	BRN3A
3	2	35	187	157	137.532	75% HEKn Medium	2	BRN3A
3	3	35	178	143	125.268	75% HEKn Medium	2	BRN3A
3	4	35	146	121	105.996	75% HEKn Medium	2	BRN3A
3	5	35	180	150	131.4	75% HEKn Medium	2	BRN3A
3	6	35	180	149	131.12	75% HEKn Medium	2	Peripherin
3	7	35	197	169	148.72	75% HEKn Medium	2	Peripherin
3	8	35	178	157	138.16	75% HEKn Medium	2	Peripherin
4	2	35	189	177	155.76	75% HEKn Medium	2	Peripherin
4	3	35	156	149	131.12	75% HEKn Medium	2	Peripherin
4	4	35	178	167	0	75% HEKn Medium	2	Islet1
4	5	35	177	165	0	75% HEKn Medium	2	Islet1
4	6	35	198	153	0	75% HEKn Medium	2	Islet1
4	7	35	143	112	0	75% HEKn Medium	2	Islet1
4	8	35	174	132	0	75% HEKn Medium	2	Islet1

## Sheet: Figure 3D
Row	Column	Number of Fields	Nuclei - Number of Objects	Nuclei Selected - Number of Objects	Nuclei Selected - Average Neurite Legnth (um)	Cell Type	Plate	Marker	Timepoint
2	3	35	175	162	29	75% HEKn Medium	1	TuJ1	2 days
2	4	35	141	122	20	75% HEKn Medium	1	TuJ1	2 days
2	5	35	134	109	28	75% HEKn Medium	1	TuJ1	2 days
3	4	35	125	98	81	75% HEKn Medium	1	TuJ1	5 days
3	5	35	186	148	74	75% HEKn Medium	1	TuJ1	5 days
3	6	35	146	118	93	75% HEKn Medium	1	TuJ1	5 days
4	5	35	134	99	144	75% HEKn Medium	1	TuJ1	10 days
4	6	35	195	127	156	75% HEKn Medium	1	TuJ1	10 days
4	7	35	128	89	137	75% HEKn Medium	1	TuJ1	10 days
Row	Column		Nuclei - Number of Objects	Nuclei Selected - Number of Objects	Nuclei Selected - Average Neurite Legnth (um)	Cell Type	Plate	Marker	Timepoint
2	6	35	156	116	19	75% HEKn Medium	2	TuJ1	2 days
2	7	35	195	167	39	75% HEKn Medium	2	TuJ1	2 days
3	3	35	164	139	34	75% HEKn Medium	2	TuJ1	2 days
3	7	35	153	109	116	75% HEKn Medium	2	TuJ1	5 days
4	3	35	150	114	99	75% HEKn Medium	2	TuJ1	5 days
4	4	35	151	136	89	75% HEKn Medium	2	TuJ1	5 days
5	3	35	191	149	138	75% HEKn Medium	2	TuJ1	10 days
5	4	35	174	135	151	75% HEKn Medium	2	TuJ1	10 days
5	5	35	164	115	139	75% HEKn Medium	2	TuJ1	10 days

## Sheet: Figure 3E
Row	Column	Number of Fields	Nuclei - Number of Objects	Nuclei Selected - Number of Objects	Nuclei Selected - Average TuJ1 Positive Cells	Cell Type	Plate	Marker
6	3	35	175	162	121.16	Neuron Medium	1	TuJ1
6	4	35	141	122	91.56	Neuron Medium	1	TuJ1
6	5	35	134	109	81.2	Neuron Medium	1	TuJ1
6	6	35	125	98	73.34	Neuron Medium	1	TuJ1
3	5	35	186	148	133.38	75% HEKn Medium	1	TuJ1
3	6	35	146	118	106.38	75% HEKn Medium	1	TuJ1
4	5	35	134	99	89.19	75% HEKn Medium	1	TuJ1
4	6	35	195	127	114.27	75% HEKn Medium	1	TuJ1
Row	Column		Nuclei - Number of Objects	Nuclei Selected - Number of Objects	Nuclei Selected - Average Neurite Legnth (um)	Cell Type	Plate	Marker
6	6	35	156	116	85.96	Neuron Medium	2	TuJ1
6	7	35	195	167	123.77	Neuron Medium	2	TuJ1
6	3	35	164	139	102.99	Neuron Medium	2	TuJ1
6	7	35	153	109	80.79	Neuron Medium	2	TuJ1
4	3	35	150	114	102.642	75% HEKn Medium	2	TuJ1
4	4	35	151	136	122.448	75% HEKn Medium	2	TuJ1
5	3	35	191	149	134.147	75% HEKn Medium	2	TuJ1
5	4	35	174	135	121.545	75% HEKn Medium	2	TuJ1

## Sheet: Figure 5G
Row	Column	Nuclei - Number of Objects	Nuclei Selected - Number of Objects	Nuclei Selected - Fluorescence Intensity	Cell Type	Plate	Marker	Timepoint
2	4	302	266	22	75% HEKn Medium	1	TRPV1	2 days
3	4	353	316	24	75% HEKn Medium	1	TRPV1	2 days
4	4	278	249	31	75% HEKn Medium	1	TRPV1	2 days
5	4	234	214	18	75% HEKn Medium	1	TRPV1	2 days
6	4	245	222	26	75% HEKn Medium	1	TRPV1	2 days
2	4	286	269	105	75% HEKn Medium	1	TRPV1	5 days
3	4	341	304	103	75% HEKn Medium	1	TRPV1	5 days
4	4	268	244	109	75% HEKn Medium	1	TRPV1	5 days
5	4	221	196	101	75% HEKn Medium	1	TRPV1	5 days
6	4	280	252	99	75% HEKn Medium	1	TRPV1	5 days
2	4	290	267	146	75% HEKn Medium	1	TRPV1	10 days
3	4	265	239	151	75% HEKn Medium	1	TRPV1	10 days
4	4	304	287	153	75% HEKn Medium	1	TRPV1	10 days
5	4	279	261	143	75% HEKn Medium	1	TRPV1	10 days
6	4	285	262	154	75% HEKn Medium	1	TRPV1	10 days
Row	Column	Nuclei - Number of Objects	Nuclei - Nuclei Selected - Mean per Well		Cell Type	Plate	Marker	Timepoint
2	4	180	149	34	75% HEKn Medium	2	TRPV1	2 days
3	4	146	121	32	75% HEKn Medium	2	TRPV1	2 days
4	4	187	157	32	75% HEKn Medium	2	TRPV1	2 days
5	4	197	169	32	75% HEKn Medium	2	TRPV1	2 days
6	4	180	150	29	75% HEKn Medium	2	TRPV1	2 days
2	4	178	143	83	75% HEKn Medium	2	TRPV1	5 days
3	4	187	157	89	75% HEKn Medium	2	TRPV1	5 days
4	4	178	143	65	75% HEKn Medium	2	TRPV1	5 days
5	4	146	121	86	75% HEKn Medium	2	TRPV1	5 days
6	4	180	150	86	75% HEKn Medium	2	TRPV1	5 days
2	4	180	149	126	75% HEKn Medium	2	TRPV1	10 days
3	4	197	169	142	75% HEKn Medium	2	TRPV1	10 days
4	4	178	157	140	75% HEKn Medium	2	TRPV1	10 days
5	4	189	177	155	75% HEKn Medium	2	TRPV1	10 days
6	4	156	149	131	75% HEKn Medium	2	TRPV1	10 days

## Sheet: Figure 5N
Row	Column	Nuclei - Number of Objects	Nuclei Selected - Number of Objects	Nuclei Selected - Fluorescence Intensity	Cell Type	Plate	Marker	Timepoint
2	3	302	266	321	75% HEKn Medium	1	Islet1	2 days
3	3	353	316	328	75% HEKn Medium	1	Islet1	2 days
4	3	278	249	298	75% HEKn Medium	1	Islet1	2 days
5	3	234	214	390	75% HEKn Medium	1	Islet1	2 days
6	3	245	222	302	75% HEKn Medium	1	Islet1	2 days
2	3	286	269	658	75% HEKn Medium	1	Islet1	5 days
3	3	341	304	652	75% HEKn Medium	1	Islet1	5 days
4	3	268	244	681	75% HEKn Medium	1	Islet1	5 days
5	3	221	196	651	75% HEKn Medium	1	Islet1	5 days
6	3	280	252	675	75% HEKn Medium	1	Islet1	5 days
2	3	290	267	934	75% HEKn Medium	1	Islet1	10 days
3	3	265	239	891	75% HEKn Medium	1	Islet1	10 days
4	3	304	287	897	75% HEKn Medium	1	Islet1	10 days
5	3	279	261	912	75% HEKn Medium	1	Islet1	10 days
6	3	285	262	830	75% HEKn Medium	1	Islet1	10 days
Row	Column	Nuclei - Number of Objects	Nuclei - Nuclei Selected - Mean per Well		Cell Type	Plate	Marker	Timepoint
2	3	180	149	291	75% HEKn Medium	2	Islet1	2 days
3	3	146	121	371	75% HEKn Medium	2	Islet1	2 days
4	3	187	157	329	75% HEKn Medium	2	Islet1	2 days
5	3	197	169	265	75% HEKn Medium	2	Islet1	2 days
6	3	180	150	313	75% HEKn Medium	2	Islet1	2 days
2	3	178	143	659	75% HEKn Medium	2	Islet1	5 days
3	3	187	157	648	75% HEKn Medium	2	Islet1	5 days
4	3	178	143	681	75% HEKn Medium	2	Islet1	5 days
5	3	146	121	669	75% HEKn Medium	2	Islet1	5 days
6	3	180	150	620	75% HEKn Medium	2	Islet1	5 days
2	3	180	149	852	75% HEKn Medium	2	Islet1	10 days
3	3	197	169	899	75% HEKn Medium	2	Islet1	10 days
4	3	178	157	838	75% HEKn Medium	2	Islet1	10 days
5	3	189	177	878	75% HEKn Medium	2	Islet1	10 days
6	3	156	149	906	75% HEKn Medium	2	Islet1	10 days

## Sheet: Figure 5U
Row	Column	Nuclei - Number of Objects	Nuclei Selected - Number of Objects	Nuclei Selected - Fluorescence Intensity	Cell Type	Plate	Marker	Timepoint
2	2	302	266	456	75% HEKn Medium	1	Peripherin	2 days
3	2	353	316	432	75% HEKn Medium	1	Peripherin	2 days
4	2	278	249	487	75% HEKn Medium	1	Peripherin	2 days
5	2	234	214	492	75% HEKn Medium	1	Peripherin	2 days
6	2	245	222	419	75% HEKn Medium	1	Peripherin	2 days
2	2	286	269	511	75% HEKn Medium	1	Peripherin	5 days
3	2	341	304	515	75% HEKn Medium	1	Peripherin	5 days
4	2	268	244	512	75% HEKn Medium	1	Peripherin	5 days
5	2	221	196	554	75% HEKn Medium	1	Peripherin	5 days
6	2	280	252	490	75% HEKn Medium	1	Peripherin	5 days
2	2	290	267	743	75% HEKn Medium	1	Peripherin	10 days
3	2	265	239	762	75% HEKn Medium	1	Peripherin	10 days
4	2	304	287	745	75% HEKn Medium	1	Peripherin	10 days
5	2	279	261	741	75% HEKn Medium	1	Peripherin	10 days
6	2	285	262	764	75% HEKn Medium	1	Peripherin	10 days
Row	Column	Nuclei - Number of Objects	Nuclei - Nuclei Selected - Mean per Well		Cell Type	Plate	Marker	Timepoint
2	2	180	149	461	75% HEKn Medium	2	Peripherin	2 days
3	2	146	121	461	75% HEKn Medium	2	Peripherin	2 days
4	2	187	157	418	75% HEKn Medium	2	Peripherin	2 days
5	2	197	169	442	75% HEKn Medium	2	Peripherin	2 days
6	2	180	150	436	75% HEKn Medium	2	Peripherin	2 days
2	2	178	143	492	75% HEKn Medium	2	Peripherin	5 days
3	2	187	157	491	75% HEKn Medium	2	Peripherin	5 days
4	2	178	143	549	75% HEKn Medium	2	Peripherin	5 days
5	2	146	121	492	75% HEKn Medium	2	Peripherin	5 days
6	2	180	150	522	75% HEKn Medium	2	Peripherin	5 days
2	2	180	149	732	75% HEKn Medium	2	Peripherin	10 days
3	2	197	169	730	75% HEKn Medium	2	Peripherin	10 days
4	2	178	157	753	75% HEKn Medium	2	Peripherin	10 days
5	2	189	177	733	75% HEKn Medium	2	Peripherin	10 days
6	2	156	149	727	75% HEKn Medium	2	Peripherin	10 days
