# Supplementary material for: Generation of iPSC-Derived Human Peripheral Sensory Neurons Releasing Substance P Elicited by TRPV1 Agonists
Source: Front Mol Neurosci. 2018 Aug 22;11:277. doi: 10.3389/fnmol.2018.00277 (PMC6113370; doi:10.3389/fnmol.2018.00277)
Supplement: Supplementary file 11 [file Data_Sheet_2.xlsx]

## Sheet: table.expression.EP.CM.annot.ta
ens_gene	gene_name	PSN-C1	PSN-C2	PSN-C3	PSN-CM1	PSN-CM2	PSN-CM3
ENSG00000092847	AGO1	21667	220899	207756	180132	186198	186862
ENSG00000123908	AGO2	11367	12672	115273	101548	919017	12308
ENSG00000126070	AGO3	707627	76156	600071	5758	528819	620421
ENSG00000134698	AGO4	167922	182047	162517	156641	165246	155501
ENSG00000121410	A1BG	695938	872253	124218	124033	107916	122956
ENSG00000148584	A1CF	0.0248167	0.0389406	0.0225629	0.0869866	0.10993	0.0225365
ENSG00000175899	A2M	743322	787076	615084	888606	889899	100509
ENSG00000166535	A2ML1	0.401141	0.335714	0.410263	553209	440874	470141
ENSG00000256069	A2MP1	0.277248	0.337488	0.435886	0.615254	0.22429	0.269227
ENSG00000184389	A3GALT2	0	0.083757	0.0677597	0	0.136355	0
ENSG00000128274	A4GALT	0.166223	0.622204	0.467776	113193	0.774979	120992
ENSG00000118017	A4GNT	0	0.0268617	0	0.0450814	0	0
ENSG00000094914	AAAS	537942	520134	550876	492382	524366	442901
ENSG00000081760	AACS	125391	127815	148726	144748	138955	142451
ENSG00000250420	AACSP1	497682	505751	512125	424505	570458	377758
ENSG00000114771	AADAC	0	0	0	0	0.120976	0.121623
ENSG00000197953	AADACL2	0	0.0200481	0.0343946	119493	0.968171	122303
ENSG00000261846	AADACL2	0	0.0200481	0.0343946	122295	10266	0.912451
ENSG00000188984	AADACL3	0	0	0	0	0	0
ENSG00000204518	AADACL4	0	0.0290881	0	0	0	0
ENSG00000240602	AADACP1	0	0.0894683	0	0	0.150028	0
ENSG00000109576	AADAT	254672	240075	239164	222884	219661	220536
ENSG00000158122	AAED1	390709	40548	403336	45885	472199	478083
ENSG00000103591	AAGAB	454932	426974	423669	460812	418321	495515
ENSG00000115977	AAK1	200247	208243	206974	167814	15188	201876
ENSG00000087884	AAMDC	331096	369826	324057	334956	285154	36.8
ENSG00000127837	AAMP	640955	623024	708755	599827	692209	790569
ENSG00000129673	AANAT	0.163744	0.164738	0.128754	0.156955	0.130307	0.145402
ENSG00000131043	AAR2	242111	212912	245028	219211	231192	224412
ENSG00000205002	AARD	131481	159187	103587	104692	0.849271	0.915419
ENSG00000090861	AARS	779947	745965	814609	756334	83298	814947
ENSG00000124608	AARS2	536128	535228	587157	58077	58291	661283
ENSG00000266967	AARSD1	410246	40696	396543	37155	399731	350151
ENSG00000249038	AARSP1	0	0	0	0	0	0
ENSG00000157426	AASDH	144496	135112	139211	14276	143028	165856
ENSG00000149313	AASDHPPT	109658	100751	110449	963756	988672	942567
ENSG00000008311	AASS	138673	137316	14309	132058	13163	15.99
ENSG00000275700	AATF	111654	110743	115781	11152	112298	117436
ENSG00000276072	AATF	111654	110743	115781	11152	112298	117436
ENSG00000181409	AATK	443355	681094	635694	588119	396507	520409
ENSG00000225180	AATK-AS1	0.265402	0.248624	0.188054	0.0390882	0.150557	0.248488
ENSG00000183044	ABAT	377578	384023	360416	318969	354721	355593
ENSG00000283276	ABBA01000935.1	0	0	0	0	0	0
ENSG00000283544	ABBA01000935.2	0	0	0	0	0	0
ENSG00000265019	ABBA01006766.1	0	0	0	0	0	0
ENSG00000265233	ABBA01006766.2	0	0.262459	0	0	0	0
ENSG00000283069	ABBA01031660.1	0	0.0493122	0	0	0	0
ENSG00000282935	ABBA01031661.1	0	0	0	0	0	0
ENSG00000282911	ABBA01031663.1	0.121742	0.0617487	0.0797914	0.0816488	0.13417	0.154773
ENSG00000283020	ABBA01031674.1	0.270096	0.198301	0.164616	0.168514	0.161922	0.0866327
ENSG00000283906	ABBA01040607.1	0	0	0	0	0	0
ENSG00000165029	ABCA1	163338	197579	16.37	162296	152737	180128
ENSG00000154263	ABCA10	0.289506	0.213973	0.388501	0.180517	0.416748	0.153575
ENSG00000251595	ABCA11P	653423	55756	495402	505236	528772	534575
ENSG00000144452	ABCA12	0.429401	0.455943	0.39181	127824	10839	13342
ENSG00000179869	ABCA13	11133	138767	0.941877	165395	170431	221607
ENSG00000238098	ABCA17P	275458	170646	303428	136435	221717	166317
ENSG00000107331	ABCA2	416232	463805	488845	433663	440642	418826
ENSG00000167972	ABCA3	34861	368538	392624	307011	324967	334338
ENSG00000198691	ABCA4	0.303075	0.080502	0.068955	0.222526	0.111779	0.111632
ENSG00000154265	ABCA5	135674	148924	12.71	148013	139156	128843
ENSG00000154262	ABCA6	0.232769	0.261984	0.214827	0.189258	0.482955	0.103109
ENSG00000064687	ABCA7	232157	213818	303545	217656	202107	243394
ENSG00000141338	ABCA8	141467	13.4	131093	130087	104637	124826
ENSG00000154258	ABCA9	118282	153342	113596	178316	111288	104432
ENSG00000085563	ABCB1	0.580392	0.535114	0.66539	0.361666	0.695922	0.376904
ENSG00000135776	ABCB10	635396	685434	554171	657906	589734	503872
ENSG00000280461	ABCB10P1	0	0	0	0	0	0
ENSG00000281173	ABCB10P1	0	0	0	0	0	0
ENSG00000274099	ABCB10P1	0	0	0	0	0	0
ENSG00000261524	ABCB10P3	0	0.000000000646452	0	0	0	0
ENSG00000282479	ABCB10P3	0	0.00000725022	0	0.0000184862	0.000122833	0
ENSG00000282004	ABCB10P4	0	0	0	0	0	0
ENSG00000260053	ABCB10P4	0	0	0	0	0	0
ENSG00000274192	ABCB10P4	0	0	0	0	0	0
ENSG00000276582	ABCB11	0.0432883	0.0598385	0.205224	0	0.0277494	0.0200391
ENSG00000073734	ABCB11	0.0562003	0.0365601	0	0.0578899	0.088125	0.0630846
ENSG00000005471	ABCB4	139006	116034	0.84855	0.632385	126559	106807
ENSG00000004846	ABCB5	0.169717	0.164021	0.284709	0.229502	0.230636	0.207228
ENSG00000115657	ABCB6	247468	24.05	271525	239493	265459	266032
ENSG00000131269	ABCB7	191508	181493	20.4	190916	20398	20249
ENSG00000197150	ABCB8	19838	211633	234242	196144	190181	218466
ENSG00000150967	ABCB9	749708	791876	871827	770114	725896	725378
ENSG00000103222	ABCC1	190819	260206	276558	179824	138304	325306
ENSG00000278183	ABCC1	105897	101754	106575	106736	123643	123255
ENSG00000124574	ABCC10	24069	230799	258517	183259	216397	239601
ENSG00000121270	ABCC11	106085	0.644121	121601	0.661962	0.960082	0.743203
ENSG00000140798	ABCC12	0.0629826	0.0115066	0.0323087	0	0.164825	0.0657731
ENSG00000243064	ABCC13	0.0327955	0.0286482	0.064396	0.0729405	0	0.0247724
ENSG00000023839	ABCC2	0.565156	0.166919	0.221524	0.465792	0.397748	0.361436
ENSG00000108846	ABCC3	0.465336	0.981621	0.403948	143586	179124	142834
ENSG00000125257	ABCC4	689254	720447	739089	743231	61865	703952
ENSG00000114770	ABCC5	311244	299515	346065	274351	274119	285414
ENSG00000275331	ABCC6	160995	164191	170053	250654	126699	206481
ENSG00000091262	ABCC6	173934	209741	0.754437	166188	170618	253849
ENSG00000256340	ABCC6P1	0.934322	10923	13769	181739	115556	0.93981
ENSG00000273808	ABCC6P2	0.0564314	0.0473575	0.0254791	0.00000192983	0.265104	0.124049
ENSG00000255277	ABCC6P2	123625	0.779289	194921	165286	220139	137283
ENSG00000006071	ABCC8	419769	405288	429398	290238	339986	416985
ENSG00000069431	ABCC9	618631	729458	554388	555779	631797	737395
ENSG00000101986	ABCD1	464974	524721	595489	429896	425398	506053
ENSG00000215151	ABCD1P2	0	0	0	0	0.0367093	0
ENSG00000261233	ABCD1P3	0.0505495	0	0	0	0	0
ENSG00000225293	ABCD1P4	0	0	0	0	0	0
ENSG00000214330	ABCD1P5	0	0.0487395	0	0	0	0
ENSG00000173208	ABCD2	247794	294567	187492	168799	168756	182945
ENSG00000117528	ABCD3	500727	514045	437909	455587	393589	406915
ENSG00000119688	ABCD4	716954	664357	827779	680733	663001	664439
ENSG00000164163	ABCE1	405642	369459	37243	423695	349001	471967
ENSG00000206490	ABCF1	619819	586034	619049	497429	546332	705306
ENSG00000236342	ABCF1	750819	654764	798183	917062	103505	288284
ENSG00000204574	ABCF1	917725	100881	118378	683928	668106	129103
ENSG00000231129	ABCF1	750819	654764	798183	917062	103505	288284
ENSG00000236149	ABCF1	619819	586034	619049	497429	546332	705306
ENSG00000232169	ABCF1	619819	586034	619049	497429	546332	705306
ENSG00000225989	ABCF1	613727	586494	620103	498187	495476	706139
ENSG00000033050	ABCF2	313801	351246	327449	310769	323244	330298
ENSG00000242159	ABCF2P1	0.0183848	0.024069	0.0405892	0	0.0386316	0.0828812
ENSG00000228769	ABCF2P2	0	0	0	0	0	0
ENSG00000161204	ABCF3	361791	388774	402211	342952	318352	36499
ENSG00000160179	ABCG1	148699	162333	144664	212034	225697	238224
ENSG00000118777	ABCG2	0.207277	0.135171	0.207495	0.233024	0.436173	0.344909
ENSG00000172350	ABCG4	587291	607635	715779	614243	640576	75328
ENSG00000138075	ABCG5	0.081541	0.0736395	0.0247402	0	0.0716692	0.0917464
ENSG00000143921	ABCG8	0.0362001	0	0.0261725	0.026301	0	0
ENSG00000143994	ABHD1	245892	262583	166331	19939	171183	16683
ENSG00000144827	ABHD10	850018	89642	809394	781396	755806	723214
ENSG00000106077	ABHD11	120252	112382	125103	113412	104352	145255
ENSG00000100997	ABHD12	466126	465998	470486	437671	433625	470737
ENSG00000131969	ABHD12B	391176	459953	299707	479099	508914	451809
ENSG00000139826	ABHD13	78803	102006	701525	829209	715177	633705
ENSG00000248487	ABHD14A	126434	118197	153322	105132	115522	113102
ENSG00000114786	ABHD14A-ACY1	284458	535131	156316	272185	348218	143144
ENSG00000114779	ABHD14B	787386	702118	686609	922233	962668	951675
ENSG00000168792	ABHD15	54747	455203	479351	533713	511116	57415
ENSG00000206403	ABHD16A	882353	77041	802187	486532	6027	662434
ENSG00000224552	ABHD16A	0.260957	0.592241	0.68573	0.474292	0.759746	0.412915
ENSG00000236063	ABHD16A	471762	528638	650999	510596	648087	454246
ENSG00000230475	ABHD16A	681083	661632	717012	432146	565092	527971
ENSG00000204427	ABHD16A	108527	200975	21852	279214	159934	121189
ENSG00000235676	ABHD16A	471762	528638	650999	510596	648087	454246
ENSG00000231488	ABHD16A	471762	528638	650999	510596	648087	454246
ENSG00000183260	ABHD16B	0.569901	130409	0.937992	128995	131222	130154
ENSG00000129968	ABHD17A	162241	229882	270938	291493	220108	275273
ENSG00000198658	ABHD17AP1	0	0	0	0.109457	0.119862	0
ENSG00000250536	ABHD17AP3	0	0.0408403	0.069461	0	0	0.0707264
ENSG00000229107	ABHD17AP4	0	0	0	0	0	0
ENSG00000263366	ABHD17AP5	0	0	0	0	0	0
ENSG00000226981	ABHD17AP6	0	0	0.173232	0	0	0
ENSG00000260864	ABHD17AP7	0	0	0	0	0	0
ENSG00000260540	ABHD17AP8	0	0	0	0	0	0
ENSG00000261536	ABHD17AP9	0	0	0	0	0	0
ENSG00000107362	ABHD17B	174377	205168	164741	210663	15019	155021
ENSG00000136379	ABHD17C	155138	150641	148273	188725	180947	185245
ENSG00000164074	ABHD18	96455	913935	10722	103225	95558	108057
ENSG00000140526	ABHD2	26828	29031	263427	238993	217791	259583
ENSG00000158201	ABHD3	466168	461021	384543	415025	404021	417785
ENSG00000100439	ABHD4	621407	634841	588519	477856	523908	579157
ENSG00000011198	ABHD5	150503	151449	11861	18801	177606	202607
ENSG00000163686	ABHD6	235402	201399	196106	211773	210656	203683
ENSG00000127220	ABHD8	817402	980527	121796	946192	975329	102847
ENSG00000136754	ABI1	304969	274575	289008	329546	335502	339569
ENSG00000271484	ABI1P1	0.0743431	0.0972756	0	0	0.0781545	0.0840319
ENSG00000138443	ABI2	964353	101061	887255	88882	820044	855443
ENSG00000108798	ABI3	0.100181	0.086512	0.0707356	0.0722799	0.0694988	0.074404
ENSG00000154175	ABI3BP	713118	826651	820806	475935	555046	56999
ENSG00000097007	ABL1	386168	399491	417887	350754	348871	379166
ENSG00000143322	ABL2	901996	105818	902144	89577	816305	102158
ENSG00000099204	ABLIM1	545223	549706	533648	618061	594177	648267
ENSG00000163995	ABLIM2	105555	103973	100044	915527	897603	882222
ENSG00000173210	ABLIM3	199281	19.39	235324	174683	169155	184251
ENSG00000175164	ABO	0.185424	0.218118	0.165342	0.212351	0.192483	0.318572
ENSG00000281879	ABO	0	0	0	0	0	0
ENSG00000278741	ABR	339291	370627	516754	323254	342984	461031
ENSG00000159842	ABR	745561	661279	717958	546834	620224	88493
ENSG00000276016	ABR	955529	895187	941469	824748	924753	933164
ENSG00000174429	ABRA	0.0609069	0.0399612	0	0.0676161	0	0.0344247
ENSG00000146386	ABRACL	218357	233495	200723	267225	276403	265415
ENSG00000146109	ABT1	934245	885796	957787	100583	995423	996147
ENSG00000250496	ABT1P1	0	0	0	0	0	0
ENSG00000114626	ABTB1	265715	350368	41099	320203	349718	428544
ENSG00000166016	ABTB2	164344	17831	188144	156472	180172	196019
ENSG00000242156	AC000041.1	0	0	0	0	0	0
ENSG00000274457	AC000041.2	896298	394486	58534	451788	350414	42501
ENSG00000230485	AC000077.1	0	0	0	0	0.0854616	0
ENSG00000232926	AC000078.1	0	0	0	0	0	0
ENSG00000230194	AC000081.1	0	0	0	0	0	0
ENSG00000235776	AC000089.1	0.0412159	0	0.179613	0	0	0.276791
ENSG00000270393	AC000095.1	101022	126093	1619	126793	14998	139004
ENSG00000283366	AC000095.2	649371	511593	714289	322272	862619	72434
ENSG00000234001	AC000111.2	0	0	0	0	0	0
ENSG00000237974	AC000111.3	0	0	0	0	0	0
ENSG00000230820	AC000362.1	0	0	0	0	0	0
ENSG00000224981	AC000367.1	118081	0.900628	119974	150399	0.609758	0.839874
ENSG00000227249	AC000374.1	0	0.0309415	0	0	0	0
ENSG00000283208	AC001226.2	39709	473032	367641	420325	509565	417264
ENSG00000213683	AC002056.1	0.0294826	0.0393166	0.064931	0	0	0
ENSG00000283252	AC002056.3	0.0294826	0.0393166	0.064931	0	0	0
ENSG00000235639	AC002069.1	0	0.0457517	0	0	0	0
ENSG00000270812	AC002069.2	0	0	0	0	0	0
ENSG00000225898	AC002075.1	0	0	0	0	0	0
ENSG00000237729	AC002075.2	0	0	0	0	0	0
ENSG00000278388	AC002076.2	0	0	0	0	0	0
ENSG00000273171	AC002094.3	0	0	0	0	0	0
ENSG00000283758	AC002115.2	0	0	0	0	0	0
ENSG00000227979	AC002127.1	0	0	0	0	0	0
ENSG00000260494	AC002310.3	0.305096	0.067054	0.563147	0.222864	0.213574	0
ENSG00000260869	AC002310.4	0	0	0	0	0	0
ENSG00000261459	AC002310.5	0.0835095	0.235727	0.115371	0.527826	0.393515	0
ENSG00000241680	AC002350.1	0.102281	0	0	0	0	0
ENSG00000232392	AC002366.1	0	0	0	0	0	0
ENSG00000226436	AC002367.1	0	0	0.201764	0	0	0.208118
ENSG00000228341	AC002381.1	0	0	0	0	0.000000834333	0
ENSG00000261528	AC002400.1	0.454353	0.524119	0.128823	0.125855	0.238206	0.769052
ENSG00000231153	AC002429.1	0	0	0	0	0	0
ENSG00000236197	AC002429.2	0.358109	0.297411	0.434193	0.601596	0.806754	0.541852
ENSG00000251154	AC002456.2	0	0	0	0	0	0
ENSG00000284060	AC002472.2	453177	450276	417745	401869	431447	439648
ENSG00000284130	AC002472.3	0.751228	163157	125762	0.809517	0.334798	0.565251
ENSG00000223866	AC002486.1	0	0.132827	0	0	0	0
ENSG00000231525	AC002486.2	0	0	0	0	0	0
ENSG00000270425	AC002487.1	0	0.0555405	0	0	0	0
ENSG00000214111	AC002504.1	0	0	0	0	0	0
ENSG00000283479	AC002511.3	0	0	0	0	0	0
ENSG00000261457	AC002519.2	0	0.127573	0.108688	0	0.10156	0
ENSG00000233247	AC002524.1	0.0731022	0	0	0	0	0
ENSG00000227532	AC002542.1	0.502532	0	0.57893	0	105792	0
ENSG00000235945	AC002543.1	0.101923	0.0595229	0	0	0	0
ENSG00000267184	AC002545.1	0	0	0	0	0	0
ENSG00000233979	AC002553.2	0	0	0	0	0.27062	0
ENSG00000243686	AC002553.3	0	0.02407	0	0	0	0
ENSG00000239291	AC002558.1	0.112457	0.0592608	0.242127	0.326101	0.0784945	0
ENSG00000267005	AC002984.1	0.0846191	0.109942	0	0.368204	0	0.380466
ENSG00000268193	AC002985.1	0.924083	0.93449	125423	156853	0.799038	166746
ENSG00000257767	AC002996.1	0.393693	159114	0	0	0	295567
ENSG00000276391	AC003001.2	0.347262	0.201339	0.460596	0.225349	0	0.231608
ENSG00000256060	AC003002.1	189335	176731	211998	17075	184794	160921
ENSG00000268133	AC003002.2	0	0	0	0	0	0
ENSG00000268533	AC003002.3	232384	259946	244707	0.495912	156775	164431
ENSG00000269533	AC003002.4	232795	200619	243074	137124	179967	118955
ENSG00000268107	AC003005.1	0.0718365	0	0	0	0	0
ENSG00000269026	AC003006.1	0	0	0.501984	0.274889	0.265895	0.344057
ENSG00000244060	AC003029.1	0.0543216	0.0703549	0	0	0.114071	0
ENSG00000282707	AC003042.2	0.0707238	0.137245	0.152254	0.153861	0.185056	0.236989
ENSG00000214684	AC003045.1	0	0	0	0	0	0
ENSG00000225971	AC003071.1	0.058111	0	0	0	0	0
ENSG00000226573	AC003071.2	0	0	0	0	0	0
ENSG00000250318	AC003072.1	336055	330369	39376	266763	302759	377328
ENSG00000234358	AC003080.1	0.0449426	0	0	0	0.0945573	0.101375
ENSG00000267691	AC003102.2	0.0425685	0.120194	0.0476742	0.0463412	0	0
ENSG00000237539	AC003669.1	0	0	0.107546	0	0	0
ENSG00000231619	AC003685.2	0	0	0	0	0	0
ENSG00000257807	AC003686.1	0	0.143061	0	0	0	0
ENSG00000262302	AC003688.1	0	0	0	0	0	0
ENSG00000108516	AC003958.1	0	0	0	0	0	0
ENSG00000262040	AC003958.3	0	0	0	0	0.0252864	0
ENSG00000262282	AC003958.4	0	0	0	0	0	0
ENSG00000275347	AC003976.1	0	0	0	0	0	0
ENSG00000239881	AC003982.1	419515	3533	342971	725188	498938	350133
ENSG00000227948	AC003989.1	0	0	0	0	0	0
ENSG00000243621	AC003989.2	0.230604	0	0	0	0.481175	0
ENSG00000270317	AC004004.1	0	0	0	0	0	0
ENSG00000228711	AC004006.1	0	0	0	0	0	0
ENSG00000228751	AC004022.1	0	0	0	0	0	0
ENSG00000237160	AC004022.2	0	0	0	0	0	0
ENSG00000257624	AC004024.1	0	0	0	0	0	0
ENSG00000196656	AC004057.1	509864	464.28	487672	426706	550.2	498378
ENSG00000251312	AC004062.1	0	0	0	0	0	0
ENSG00000216425	AC004066.1	0	0	0	0	0	0.0838387
ENSG00000251473	AC004069.2	0	0	0	0	0	0
ENSG00000237014	AC004074.1	0	0	0	0	0	0
ENSG00000268163	AC004076.1	119106	0.764741	164493	0.665836	147614	0.469583
ENSG00000257184	AC004080.3	0.134344	0	0	0	0	0.277027
ENSG00000282015	AC004099.1	0.089894	0	0	0	0	0.101748
ENSG00000213798	AC004129.1	0	0	0	0	0	0
ENSG00000234406	AC004129.2	0	0	0	0	0	0.281441
ENSG00000267592	AC004134.1	0	0.168728	0	0	0	0.295434
ENSG00000213152	AC004217.1	0.127659	0.110138	0.0929895	0	0.0889206	0.190428
ENSG00000257658	AC004217.3	0.054146	0	0.124582	0	0	0
ENSG00000243423	AC004223.1	0.141928	387824	0.630955	0.312898	0.89002	0
ENSG00000267618	AC004223.3	0	0	0	0.476121	0	0.429879
ENSG00000240311	AC004224.1	0	0	0	0	0.118744	0
ENSG00000262554	AC004232.1	0	0	0	0	0	0
ENSG00000270168	AC004233.2	0.238733	0.217964	0.0601772	0.733627	0.588966	100166
ENSG00000240925	AC004263.1	0	0	0	0	0	0
ENSG00000283399	AC004381.2	0.0808551	0.176682	0.0598664	0.236557	0.0565495	0.121695
ENSG00000226107	AC004383.1	187843	186452	260931	129114	337455	165693
ENSG00000213269	AC004386.1	0	0	0	0	0	0
ENSG00000226515	AC004386.2	0	0	0	0	0	0
ENSG00000189343	AC004448.1	0.739578	0.717531	0.979941	0.438908	140427	101634
ENSG00000228331	AC004448.2	0.0764428	0.18182	0	0.153112	0	0
ENSG00000146677	AC004453.1	0.1774	0.11377	0	0.195175	0.186159	0.397308
ENSG00000237347	AC004461.1	0	0	0.17272	0.174801	0.167664	0
ENSG00000275194	AC004467.1	0	0	0	0	0	0
ENSG00000257905	AC004486.1	0.293648	0.584131	0.331013	0.317203	0	0
ENSG00000235713	AC004522.1	0	0	0	0	0	0
ENSG00000242978	AC004534.1	0	0	0	0	0	0
ENSG00000225071	AC004552.1	0	0	0	0.352973	0	0
ENSG00000223418	AC004554.1	0	0	0	0	0	0
ENSG00000276345	AC004556.1	0	0.223826	0	0	0	0
ENSG00000262623	AC004584.2	0.101775	0	0	0	0	0
ENSG00000235592	AC004674.1	0	0.0582687	0	0	0	0.0995831
ENSG00000282525	AC004675.2	0	0	0	0	0	0
ENSG00000275468	AC004678.1	0.0794367	0.0388496	0.0560248	0	0	0.198932
ENSG00000270264	AC004686.1	0.175145	0.152571	0.380633	0.882504	0.242926	0.518522
ENSG00000225583	AC004690.1	0	0	0	0	0	0
ENSG00000250424	AC004691.2	0.0813315	0.160331	0	0	0	0
ENSG00000213717	AC004692.1	0	0	0	0	0	0
ENSG00000276578	AC004696.1	216402	233132	247656	191052	218701	206892
ENSG00000262990	AC004706.2	0	0	0	0	0	0
ENSG00000274114	AC004706.3	192113	201355	148265	138963	138334	155637
ENSG00000282936	AC004706.4	147574	27427	203309	184155	137816	190124
ENSG00000269881	AC004754.1	313585	329284	448296	355557	305145	396301
ENSG00000277766	AC004790.1	0	0	0	0	0	0
ENSG00000226138	AC004801.1	0	0	0	0	0	0
ENSG00000240399	AC004801.2	0.605886	0.130644	0.446185	0.582483	0.211849	0.453457
ENSG00000266076	AC004805.1	0.083492	0.125066	0.454233	0	0	0
ENSG00000270870	AC004805.2	0	0	0	0	0	0
ENSG00000271587	AC004805.3	0	0.168549	0	0	0	0
ENSG00000255575	AC004812.1	0	0	0	0.575267	0	0
ENSG00000226729	AC004815.1	0	0	0	0	0	0
ENSG00000258431	AC004825.1	0	0	0	0	0	0
ENSG00000230137	AC004832.2	0	0	0	0	0	0
ENSG00000249590	AC004832.3	224812	0.986864	335835	204957	160315	233545
ENSG00000270625	AC004835.2	0	0	0	0	0	0
ENSG00000106540	AC004837.1	0	0	0	0	0	0
ENSG00000230914	AC004840.1	0	0	0	0	0.0997118	0.106794
ENSG00000271163	AC004840.2	0.126678	0	0	0	0	0
ENSG00000271526	AC004852.1	0	0	0	0	0	0
ENSG00000278446	AC004852.3	0	0	0	0	0	0
ENSG00000270729	AC004853.2	0	0	0	0	0	0
ENSG00000273377	AC004853.3	0	0	0	0	0	0.0806202
ENSG00000230160	AC004854.1	0.123129	0	0	0	0	0
ENSG00000259109	AC004858.1	0	0	0	0	0	0
ENSG00000236274	AC004865.1	0	0	0	0.097168	0	0
ENSG00000223514	AC004866.1	0	0	0	0	0	0
ENSG00000224134	AC004866.2	0	0	0	0	0	0
ENSG00000214754	AC004870.1	0	0	0	0	0	0
ENSG00000213361	AC004884.1	0	0	0	0	0	0
ENSG00000239719	AC004890.1	0	0.242554	0.410014	0	0	0
ENSG00000244560	AC004890.2	155967	166572	180026	173508	136165	154403
ENSG00000271664	AC004890.3	0.422878	0.839431	0.79083	0.779265	0.14843	0.319024
ENSG00000238109	AC004893.1	0.0773723	0.100389	0.113579	0.113174	0.108406	0.116762
ENSG00000236018	AC004898.1	0	0.146294	0	0	0.11685	0
ENSG00000225705	AC004899.1	0	0	0	0	0	0
ENSG00000228429	AC004910.1	0.192989	0.25083	0.210963	0	0.404458	0
ENSG00000226592	AC004911.1	0	0	0	0	0	0
ENSG00000284292	AC004922.1	115295	0.980426	0.99259	205009	17064	0.0000118148
ENSG00000254850	AC004923.2	0	0	0	0	0	0
ENSG00000255230	AC004923.3	0	0	0	0	0	0
ENSG00000243672	AC004924.1	0.115546	0.221996	0.140299	0	0.246148	0.148362
ENSG00000225443	AC004938.1	0	0	0	0	0	0
ENSG00000231397	AC004941.2	0	0	0	0	0	0
ENSG00000222024	AC004945.1	0	0	0	0	0	0
ENSG00000239556	AC004951.2	21349	194862	262678	212772	237625	273895
ENSG00000241057	AC004951.3	244872	272666	289932	291161	29353	376465
ENSG00000233683	AC004965.1	0	0	0	0	0	0
ENSG00000243554	AC004967.1	171677	319974	224844	249766	427293	137114
ENSG00000224629	AC004975.1	0	0	0.784888	0	0	0
ENSG00000205485	AC004980.1	274715	216456	229341	281575	296428	242914
ENSG00000214243	AC004980.2	0.412641	0.129724	0.112515	0.447344	0	0
ENSG00000230305	AC004980.3	0	0.288142	0	0	0	0.641
ENSG00000250778	AC004980.4	0.669501	0.544619	0	0	0	0
ENSG00000282254	AC004980.5	274715	216456	229341	281575	296428	242914
ENSG00000282364	AC004980.6	0.412641	0.129724	0.112515	0.447344	0	0
ENSG00000227573	AC004986.1	0	0	0	0	0	0.106922
ENSG00000231198	AC004987.1	0	0	0	0	0	0
ENSG00000233225	AC004987.2	0	0.0544069	0	0	0	0.0971498
ENSG00000237251	AC004987.3	0	0.0782622	0	0	0	0
ENSG00000270797	AC004987.4	0.365814	115447	0.746681	0.84143	104783	0
ENSG00000248751	AC004997.1	219886	188164	255857	198799	248124	102956
ENSG00000228532	AC005000.1	0.342656	0.91781	0.3913	0.394859	0	0.388297
ENSG00000270431	AC005000.2	0	0	0	0	0	0
ENSG00000224314	AC005002.1	0	0	0	0	0	0
ENSG00000238066	AC005002.2	0	0	0	0	0	0
ENSG00000214125	AC005005.1	0	0	0	0	0	0
ENSG00000235573	AC005005.2	0	0.140448	0	0	0	0
ENSG00000226671	AC005008.1	0	0	0	0.331688	0	0
ENSG00000235581	AC005011.1	0	0	0	0	0	0
ENSG00000224280	AC005014.1	0.0412878	0.0665349	0.044291	0	0.0647531	0.0691154
ENSG00000174495	AC005017.1	0.0723544	0.191104	0	0	0	0.161668
ENSG00000213875	AC005019.1	0	0.122751	0	0	0	0
ENSG00000224448	AC005020.1	0.0617491	0.318779	0	0.134628	0.128448	0
ENSG00000272647	AC005020.2	0	0.488506	0.789892	0	0	0.348582
ENSG00000233872	AC005033.1	0	0	0	0	0	0
ENSG00000230477	AC005034.1	0	0	0	0	0	0
ENSG00000226905	AC005040.1	0	0	0	0	0	0
ENSG00000234521	AC005041.1	0.0335652	0	0.0736333	0	0.0706866	0.0761854
ENSG00000227331	AC005042.1	0	0	0	0	0	0
ENSG00000231675	AC005042.3	0	0	0	0	0	0
ENSG00000273978	AC005066.1	0	0	0	0	0	0
ENSG00000270764	AC005070.1	0	0	0	0	0	0
ENSG00000271482	AC005070.2	0	0	0	0	0	0
ENSG00000213549	AC005077.1	0.0988105	0	0	0	0	0.2264
ENSG00000224273	AC005077.2	0.112868	0.071983	0	0	0	0.250523
ENSG00000228829	AC005077.3	0	0	0	0	0	0.297326
ENSG00000230882	AC005077.4	0.0731645	0.0722234	0.102231	0.23087	0.102059	0.145313
ENSG00000271330	AC005084.1	0	0	0	0	0	0
ENSG00000279724	AC005086.2	0.630131	141787	0.686264	0.345337	0.683856	0.355861
ENSG00000280004	AC005086.3	0	0	0.378667	0	0	139692
ENSG00000280404	AC005086.4	12076	0.601821	0.338509	100919	0	141823
ENSG00000278586	AC005088.1	0	0	0	0.253756	0	0
ENSG00000229949	AC005094.1	0	0	0	0	0	0
ENSG00000226624	AC005099.1	0	0.0708001	0	0	0	0
ENSG00000219039	AC005102.1	0	0.186305	0	0	0	0.163281
ENSG00000224232	AC005104.2	0.102293	0.199116	0.223948	0.111401	0.106535	0.227581
ENSG00000225286	AC005105.1	0	0	0	0.0861359	0	0
ENSG00000226874	AC005154.2	0.627421	0.408649	0.233562	0.920106	0	0.707172
ENSG00000244480	AC005154.3	226934	281869	283045	258672	240956	258553
ENSG00000281039	AC005154.6	190485	163011	18229	205376	222598	227079
ENSG00000278819	AC005156.1	0.239403	0.105709	0	0	0	0
ENSG00000239622	AC005165.2	0	0	0	0	0	0
ENSG00000268153	AC005176.1	0.118813	0.104402	0.0437633	0.0443612	0.0834086	0.136673
ENSG00000269519	AC005176.2	0	0	0	0	0	0
ENSG00000251243	AC005178.1	0	0	0	0	0	0.244191
ENSG00000271101	AC005181.1	0	0	0	0	0	0
ENSG00000271500	AC005183.1	0.0222815	0.116027	0	0	0.0469837	0
ENSG00000270794	AC005185.1	0.0469357	0.061321	0	0	0	0
ENSG00000229497	AC005189.1	0	0	0	0	0	0
ENSG00000271421	AC005191.1	0	0	0	0	0	0
ENSG00000258972	AC005225.4	0	0	0	0	0	0
ENSG00000213209	AC005229.1	0.0847734	0	0	0	0	0.192745
ENSG00000213210	AC005229.2	0	0	0.186849	0	0	0.570099
ENSG00000270200	AC005229.3	0	0	0	0	0	0
ENSG00000258930	AC005230.1	0	0	0	0	0	0.26826
ENSG00000235861	AC005237.2	0	0	0	0	0	0
ENSG00000267170	AC005242.1	0	0	0	0	0	0
ENSG00000263648	AC005244.1	0	0.472839	0	0	0	0.27084
ENSG00000271184	AC005252.1	0	0	0	0	0	0
ENSG00000256210	AC005255.1	0	0	0	0	0	0
ENSG00000273734	AC005258.1	0	0.108518	0	0	0	0
ENSG00000268723	AC005261.5	0	0.173142	0	0	0	0
ENSG00000266944	AC005262.1	0	0	0	0	0	0
ENSG00000256835	AC005294.1	0	0	0	0	0	0
ENSG00000274923	AC005296.1	0.545607	0.242555	0	0	0.383842	0
ENSG00000227511	AC005297.1	0	0	0	0	0	0
ENSG00000232644	AC005297.2	0	0	0	0	0	0
ENSG00000237171	AC005297.3	0	0	0	0	0	0
ENSG00000236325	AC005300.1	0	0.249324	0	0.214404	0	0
ENSG00000251537	AC005324.3	0.0898455	0.0636869	0	0	0.257693	0.11286
ENSG00000255104	AC005324.4	148354	0.996044	184711	14003	119181	176467
ENSG00000267227	AC005324.6	0	0.0772178	0.188824	0	0.109792	0
ENSG00000226744	AC005326.1	0.311187	0.413778	0.699075	137174	0.653635	0
ENSG00000267352	AC005332.2	306685	285011	455707	32063	301964	316016
ENSG00000267472	AC005332.3	0	0.186522	0.100302	0	0.102312	0
ENSG00000267708	AC005332.4	0.26333	0.462683	0.146971	0.291856	0	0
ENSG00000267056	AC005336.1	0	0	0	0	0.138394	0
ENSG00000267218	AC005336.2	0	0	0	0	0	0.0771977
ENSG00000263252	AC005341.1	0	0	0	0	0	0
ENSG00000236160	AC005345.1	0	0	0	0	0	0
ENSG00000248493	AC005351.1	0	0	0	0	0	0
ENSG00000266906	AC005357.1	0	0	0	0	0	0
ENSG00000267623	AC005357.2	0.248997	0.276475	0.197465	0	0.0834927	0
ENSG00000255513	AC005363.1	0.24855	10943	0.295645	0	0.86603	0.465261
ENSG00000270512	AC005377.1	0.16372	0.108099	0	0.180293	0.172497	0.186086
ENSG00000241185	AC005410.1	0.308658	0.453854	0	0.182855	0	0.186006
ENSG00000178082	AC005412.1	0.0650301	0	0.158582	0	0	0
ENSG00000239256	AC005412.2	0	0	0	0	0	0
ENSG00000264050	AC005412.3	0	0.054103	0.0899595	0	0	0
ENSG00000259079	AC005476.1	0.0895104	0	0	0	0.376591	0
ENSG00000258769	AC005479.1	0.369058	0.853064	0.208236	0.406885	0.384699	0.206173
ENSG00000279461	AC005480.2	0	0	0	0	0	0
ENSG00000267361	AC005495.1	0	0	0	0	0.140516	0
ENSG00000223878	AC005517.1	244145	189354	302146	334041	304276	32701
ENSG00000234324	AC005517.2	0.354801	0.281732	0.645036	0.156478	0.300426	0.645458
ENSG00000270634	AC005518.2	0	0	0	0	0	0
ENSG00000177776	AC005519.1	0	0	0	0	0	0
ENSG00000258653	AC005520.1	245239	184749	216082	153253	247463	257102
ENSG00000270576	AC005520.4	0	0	0	0	0	0
ENSG00000213296	AC005521.1	0	0	0	0.0774205	0	0
ENSG00000213548	AC005522.1	0	0	0	0	0	0
ENSG00000283269	AC005524.1	0.142111	0.153073	0	0.192373	0	0
ENSG00000253183	AC005531.1	0.174059	0.0752368	0.0622283	0.203995	0.117701	0
ENSG00000244167	AC005532.2	0	0	0	0	0	0
ENSG00000234450	AC005534.2	0.698059	0.349174	0.389099	0.381716	0.18456	0.392486
ENSG00000228937	AC005539.1	0	0.0375823	0	0	0	0
ENSG00000235828	AC005550.2	0	0	0	0	0	0
ENSG00000267036	AC005559.1	0	0	0	0.0805792	0	0
ENSG00000273609	AC005562.2	0	0	0	0	0	0
ENSG00000216917	AC005587.1	0	0.0752592	0	0	0	0
ENSG00000226509	AC005588.1	0	0	0	0	0	0
ENSG00000276545	AC005618.2	0.190609	0.14471	0.104659	0.139388	0.199672	0.142556
ENSG00000283525	AC005622.1	0.0197425	0.069301	0	0.042789	0.0413487	0.040194
ENSG00000257639	AC005632.1	0	0	0	0	0	0
ENSG00000271609	AC005632.3	0	0	0	0	0	0
ENSG00000262609	AC005668.1	0	0.115101	0	0	0	0
ENSG00000262633	AC005670.2	142605	167693	124827	146682	169051	170031
ENSG00000226329	AC005682.1	0.0236912	0	0	0.207134	0.148671	0.159201
ENSG00000266202	AC005697.1	0.232621	0	0.275861	0	0	0.236913
ENSG00000267318	AC005702.2	170367	22378	275703	28084	219683	151355
ENSG00000267526	AC005702.3	0	0.0458856	0.0790361	0	0.0728508	0
ENSG00000274378	AC005702.4	0	0.493231	0.305726	0.460407	0.152251	0.231685
ENSG00000275860	AC005702.5	0	0.0874377	0	0	0	0
ENSG00000230607	AC005722.1	0	0	0	0	0	0
ENSG00000240494	AC005726.1	0	0	0	0	0.0623593	103041
ENSG00000258472	AC005726.2	348105	338062	452141	315185	34453	358522
ENSG00000225681	AC005730.1	0	0	0	0	0	0
ENSG00000226040	AC005740.1	0	0.202363	0	0.17506	0	0.176366
ENSG00000250347	AC005740.2	0	0.103282	0.175356	0	0.168863	0
ENSG00000249418	AC005741.1	0	0	0	0	0	0
ENSG00000267630	AC005758.1	0	0	0	0	0.133975	0
ENSG00000267471	AC005771.1	0.149063	0	0	0	0	0
ENSG00000270802	AC005776.1	0.303921	0.200714	0	0	0	0
ENSG00000267148	AC005777.1	0	0	0	0	0	0
ENSG00000267545	AC005779.2	0	0.0783006	0	0	0.209408	0.19614
ENSG00000266959	AC005786.1	0	0.386146	0	0	0	0
ENSG00000248188	AC005798.1	0	0.15399	0	0	0	0
ENSG00000235554	AC005822.1	0.0791309	0	0	0.0882574	0	0.179291
ENSG00000271749	AC005828.6	0.169897	0	0.379368	0	0	0.381502
ENSG00000271919	AC005828.7	0	0.101823	0	0	0	0
ENSG00000261575	AC005829.1	0.202389	0	0	0	0.121914	0
ENSG00000262539	AC005829.2	0	0	0	0	0	0
ENSG00000256748	AC005832.2	0.0636588	0.084377	0.0733057	0.142257	0	0.0732988
ENSG00000256799	AC005832.3	0	0	0	0	0.277135	0
ENSG00000272921	AC005832.4	131042	144222	159171	130506	148237	100505
ENSG00000151079	AC005833.1	0	0	0	0	0	0
ENSG00000255639	AC005833.3	369679	281546	769701	467363	451286	616536
ENSG00000267168	AC005837.2	0	0	0	0	0	0
ENSG00000223544	AC005838.1	0	0	0	0	0	0
ENSG00000213942	AC005840.1	0	0	0	0	0	0
ENSG00000224906	AC005840.2	0	0	0	0	0	0
ENSG00000256913	AC005840.4	0.0420651	0.036148	0.0631361	0	0	0
ENSG00000283297	AC005841.2	0.384888	0.465146	0.22164	0.505156	0.377468	0.404227
ENSG00000250770	AC005865.2	0.820381	0.977709	0.946811	0.953574	106789	0.813206
ENSG00000256125	AC005868.1	0	0	0	0	0	0
ENSG00000255595	AC005885.1	0.0462777	0	0.0643067	0.246435	0.0296241	0.0652135
ENSG00000264373	AC005899.2	0.541825	0.747423	0	0	115078	0
ENSG00000255996	AC005906.1	0	0	0	0	0.136764	0
ENSG00000243507	AC005908.1	0	0	0	0	0	0
ENSG00000227081	AC005912.1	0	0.956429	0.560245	0	0	0
ENSG00000248702	AC005921.1	0	0	0	0	0	0
ENSG00000267059	AC005943.1	13173	248777	268117	211678	190023	24085
ENSG00000263125	AC005951.1	0	0	0	0	0	0
ENSG00000263199	AC005951.2	0	0	0	0	0	0
ENSG00000229590	AC005962.1	0.0836679	0	0	0.0910592	0	0
ENSG00000270324	AC005972.2	0	0.140923	0	0	0	0
ENSG00000272164	AC005972.3	0	0	0	0	0	0
ENSG00000240132	AC005996.1	0.220316	0.214583	0	0.12066	0.113473	0.0609577
ENSG00000177418	AC006001.1	0	0	0	0	0	0
ENSG00000229180	AC006001.3	134806	134504	131381	128147	135722	12165
ENSG00000275400	AC006001.4	36833	249903	294115	667982	475885	119829
ENSG00000271611	AC006006.1	0	0	0	0	0	0
ENSG00000244563	AC006011.1	0	0	0	0	0	0
ENSG00000274010	AC006011.2	0.0903606	0.117164	0.0663078	0.13148	0.126918	0.0682821
ENSG00000226401	AC006015.1	0	0	0	0	0	0
ENSG00000226636	AC006020.1	0	0.0345831	0	0	0.0555877	0
ENSG00000223419	AC006022.1	0	0	0	0	0	0
ENSG00000270577	AC006023.1	0	0	0	0	0	0
ENSG00000273444	AC006023.2	0	0.328981	0	0	0	0.556262
ENSG00000224785	AC006026.1	0	0.0342524	0	0	0	0
ENSG00000228953	AC006026.2	0	0	0	0	0	0
ENSG00000231357	AC006028.1	0	0.794612	0	0.273558	0	0
ENSG00000264324	AC006030.1	0.449489	0.436311	0.641318	0.472876	0.363713	0.760834
ENSG00000231916	AC006033.1	0.0679975	0	0	0	0	0
ENSG00000233264	AC006042.3	0.249337	0.248392	0.0720253	0.417354	0.131939	0.142566
ENSG00000255853	AC006065.1	0	0	0	0	0	0
ENSG00000255900	AC006065.2	0	0	0	0	0	0
ENSG00000251439	AC006070.1	0	0	0	0	0	0
ENSG00000270892	AC006077.1	0	0	0	0	0	0
ENSG00000268407	AC006115.2	0.173737	0.453505	0	0	0	0
ENSG00000266907	AC006116.1	0.286078	0.258117	0.278463	0.313826	0.412419	0.36185
ENSG00000266932	AC006116.2	0.155411	0.151826	0.174343	0.425974	0.0819677	0.0881852
ENSG00000267145	AC006116.3	0.198132	0	0	0	0	0
ENSG00000267459	AC006116.7	437545	268295	953737	524782	771441	629176
ENSG00000266707	AC006120.1	0	0	0	0	0	0
ENSG00000213970	AC006122.1	0	0.0984832	0.162373	0	0	0
ENSG00000267398	AC006130.2	0	0	0.251761	0	0	0
ENSG00000278813	AC006133.1	0	0	0	0	0	0
ENSG00000233433	AC006144.1	0.0975237	0	0.217217	0.122534	0	0
ENSG00000275310	AC006158.1	0	0	0	0	0	0
ENSG00000283219	AC006160.2	0	0	0	0	0	0
ENSG00000238090	AC006195.1	0.0345988	0.0445255	0	0	0	0
ENSG00000257128	AC006197.1	0	0	0	0	0.150085	0
ENSG00000257629	AC006199.1	0	0	0	0	0	0
ENSG00000223391	AC006210.1	0	0	0	0	0	0
ENSG00000238247	AC006210.2	0	0	0	0	0	0
ENSG00000262961	AC006236.1	0.0392056	0	0	0.0843794	0.0819546	0
ENSG00000243696	AC006254.1	123524	129909	133768	160327	0.959618	0.990266
ENSG00000270941	AC006254.2	0.420408	0.370772	0.31854	0.624329	0	0
ENSG00000271137	AC006254.3	0.095582	0	0	0	0	0.214732
ENSG00000277748	AC006262.4	0	0	0	0.482391	0.233335	0.501729
ENSG00000261873	AC006269.1	307302	258514	264242	209061	28827	401307
ENSG00000264529	AC006270.2	0	0	0	0.144134	0	0
ENSG00000272383	AC006270.3	0	0	0	0	0	0
ENSG00000269483	AC006272.2	0.269993	0.139602	0	0	0	0
ENSG00000230785	AC006326.1	0	0	0	0	0	0
ENSG00000233619	AC006328.1	0	0	0	0	0	0
ENSG00000284380	AC006328.2	0	0	0	0	0	0
ENSG00000278683	AC006329.2	0.110461	0.144023	0.498627	0.246572	0.234539	0
ENSG00000235094	AC006335.1	0	0	0	0	0	0
ENSG00000242879	AC006335.2	0.106892	0.155617	0	0	0	0
ENSG00000250204	AC006335.3	0	0	0	0	0	0
ENSG00000251275	AC006335.4	0	0	0	0	0	0
ENSG00000275352	AC006335.5	0	0	0	0	0	0
ENSG00000278197	AC006338.1	0	0	0	0	0.133061	0
ENSG00000278602	AC006338.2	0	0	0	0	0	0
ENSG00000258513	AC006349.1	0.182176	0	0	0	0	0
ENSG00000229110	AC006355.1	0.0362795	0	0	0	0.076208	0
ENSG00000261778	AC006362.1	0	0	0	0	0	0
ENSG00000270611	AC006363.1	0	0	0	0	0	0
ENSG00000244000	AC006366.1	0	0	0	0	0	0
ENSG00000271027	AC006380.1	0	0	0	0	0	0
ENSG00000274899	AC006386.1	0	0	0	0	0	0
ENSG00000279115	AC006386.2	0	0	0	0	0	0
ENSG00000251638	AC006390.1	0	0	0	0	0	0
ENSG00000248851	AC006427.1	0.0933168	0.0612645	0	0	0	0.104663
ENSG00000265428	AC006441.2	0	0	0	0	0	0
ENSG00000277426	AC006441.5	0	0	0	0	0	0
ENSG00000242209	AC006445.1	0	401963	0	0	0	0
ENSG00000249148	AC006445.2	0	0	0	0	0	0.185358
ENSG00000277005	AC006449.4	125226	153132	995464	103786	159531	135019
ENSG00000283132	AC006453.1	0	0	0	0	0	0
ENSG00000283214	AC006453.3	0	0	0	0	0	0
ENSG00000283427	AC006453.4	0.48056	0	0.218409	0.122729	0.128166	0
ENSG00000283659	AC006453.5	0	0.0857838	0	0	0.137373	0
ENSG00000227545	AC006455.2	0.0462607	0.140936	0.0700802	0	0	0.0720474
ENSG00000227923	AC006455.3	0	0	0	0	0	0
ENSG00000232165	AC006455.6	0	0	0	0	0	0
ENSG00000236638	AC006455.7	0	0	0	0	0	0
ENSG00000230132	AC006457.1	0	0	0	0	0	0
ENSG00000228568	AC006461.1	0	0	0	0	0	0
ENSG00000225795	AC006463.1	0	0	0	0	0	0
ENSG00000235459	AC006463.2	0	0	0.249777	0.256309	0	0
ENSG00000232887	AC006466.1	110827	0.486814	0.817423	0.268209	102783	305837
ENSG00000228019	AC006480.1	156571	0.999599	169993	0.948595	127262	135784
ENSG00000228974	AC006483.1	0	0.295927	0	0.25405	0	0
ENSG00000223841	AC006484.1	0	0	0	0	0	0
ENSG00000268643	AC006486.1	0	0	0	0	0	0
ENSG00000248777	AC006499.1	0	0	0	0	0	0
ENSG00000250074	AC006499.2	0	0	0	0	0	0
ENSG00000250505	AC006499.3	0	0	0	0	0	0
ENSG00000250573	AC006499.4	0	0	0	0	0	0
ENSG00000251278	AC006499.5	0	0	0	0	0	0
ENSG00000251296	AC006499.6	0	0	0	0	0	0
ENSG00000251338	AC006499.7	0	0	0	0	0.0782487	0
ENSG00000271544	AC006499.8	0	0	0	0	0	0
ENSG00000267264	AC006504.3	123618	124007	0.821958	0.956441	0.920978	132535
ENSG00000267389	AC006504.4	0	0	0	0	0	0
ENSG00000267768	AC006504.6	0	0	0	0	0	0
ENSG00000224058	AC006509.1	0	0	0	0.146148	0	0.150783
ENSG00000224443	AC006509.2	0	0	0	0	0	0
ENSG00000240739	AC006511.1	0	0	0	0.28894	0	0
ENSG00000255581	AC006511.2	0.26848	0.177346	0	0.29793	0.140807	0
ENSG00000239701	AC006512.1	0.134391	0.175741	0	0	0	0
ENSG00000257078	AC006512.2	0	0	0.147268	0	0	0
ENSG00000241828	AC006517.1	0	0	0	0	0	0
ENSG00000256651	AC006518.1	0.0959611	0.0640637	0.183507	0.180487	0.135621	0.109499
ENSG00000256682	AC006518.2	0.0515274	0.040797	0	0.115289	0.0651244	0.0702003
ENSG00000272718	AC006518.3	0.0959611	0.0640637	0.183507	0.180487	0.135621	0.109499
ENSG00000272751	AC006518.4	0	0.040797	0	0.0972822	0.0651244	0.0702003
ENSG00000282174	AC006518.5	0.0959611	0.0640637	0.183507	0.180487	0.135621	0.109499
ENSG00000282363	AC006518.6	0.0515274	0.040797	0	0.115289	0.0651244	0.0702003
ENSG00000240579	AC006529.1	0	0	0	0	0	0
ENSG00000258587	AC006530.1	0	0	0	0	0	0
ENSG00000213179	AC006534.1	0	0	0	0	0	0
ENSG00000267001	AC006538.2	137269	166264	0.947845	3.27	0	228881
ENSG00000240673	AC006539.1	0.0679293	0	0	0	0	0.151057
ENSG00000268070	AC006539.2	0.0709015	0.0928432	0	0	0	0
ENSG00000274033	AC006539.3	0	0	0	0	0	0
ENSG00000225480	AC006548.1	0	0	0	0	0	0
ENSG00000270226	AC006548.2	0	0	0	0	0	0
ENSG00000267324	AC006557.2	0	0	0	0	0	0
ENSG00000267756	AC006557.4	0	0	0	0	0	0
ENSG00000270469	AC006557.5	0.0499056	0	0	0.331531	0.211606	0.228585
ENSG00000261882	AC006600.1	0	0	0	0	0	0
ENSG00000275314	AC006924.1	0	0	0	0	0	0
ENSG00000255977	AC006927.1	0	0	0	0	0	0
ENSG00000284327	AC006927.2	0	0	0	0	0	0
ENSG00000284522	AC006927.3	0.140101	0	0	0	0	0
ENSG00000284591	AC006927.4	0	0	0	0	0	0
ENSG00000235328	AC006946.1	0.31045	0.137096	0	0.223583	0	0.231007
ENSG00000234457	AC006960.1	0	0.330954	0	0	0	0
ENSG00000224341	AC006965.1	0.0935826	0.0804874	0.0667231	0	0	0.277342
ENSG00000229365	AC006967.1	0	0	0	0	0	0
ENSG00000230191	AC006970.1	0	0	0	0	0	0
ENSG00000233028	AC006970.2	0	0	0	0	0	0
ENSG00000218586	AC006971.1	0.0106164	0.0140231	0	0	0	0
ENSG00000235859	AC006978.1	480617	470251	41954	475043	459286	445973
ENSG00000281593	AC006978.2	285065	157211	216691	239241	295653	156656
ENSG00000274445	AC006986.1	0	0	0	0	0	0
ENSG00000226975	AC006987.1	0.16559	0	0.235116	0.359119	0.115257	0
ENSG00000235193	AC006987.2	0.844039	0.799347	0.363482	0.734402	0.590217	164007
ENSG00000235691	AC006987.3	0.0667764	0.172575	0	0	0.139581	0
ENSG00000278478	AC006987.4	0	0	0	0	0	0
ENSG00000224518	AC006989.1	0	0	0	0	0	0
ENSG00000231063	AC006994.1	0.0459453	0.120937	0	0.30451	0.096728	0
ENSG00000213542	AC007000.1	0.919981	0.483468	0.779417	0.691146	0.446142	0.550816
ENSG00000225726	AC007000.2	0.55736	0.856269	0.21315	0.620464	0	0.212776
ENSG00000259963	AC007012.1	0	0	0	0	0	0
ENSG00000249930	AC007016.1	0	0	0	0	0	0
ENSG00000258881	AC007040.2	0.132505	0.548222	0.147023	0.402029	0.291027	0.172887
ENSG00000235411	AC007041.1	0	0	0	0	0	0
ENSG00000237358	AC007064.1	0	0	0	0	0	0
ENSG00000237835	AC007064.3	0	0	0	0	0	0
ENSG00000283535	AC007064.4	0	0	0	0	0	0
ENSG00000213216	AC007066.1	0	0	0	0	0	0.442406
ENSG00000213443	AC007068.1	176491	0.943483	234562	286157	3204	228339
ENSG00000256912	AC007068.2	0	0.138587	0	0	0	0
ENSG00000237162	AC007098.1	0.111103	0	0.252182	0	0	0.757799
ENSG00000258148	AC007115.1	0	0	0	0	0	0
ENSG00000267180	AC007136.1	0	0	0	0	0	0
ENSG00000262516	AC007151.1	0	0	0	0	0.173685	0
ENSG00000176043	AC007160.1	0	301782	0	0	0	0
ENSG00000270314	AC007161.2	0	0	0	0.0918855	0	0
ENSG00000270447	AC007179.3	0	0	0	0	0	0
ENSG00000242951	AC007182.2	0	0	0	0.215351	0.206109	0.22075
ENSG00000268173	AC007192.1	0.47586	100265	0	157715	0.00000000173726	2774
ENSG00000273791	AC007204.2	128559	0.451878	0	0.562619	0	0
ENSG00000274800	AC007204.3	0.0722484	0	0	0	0	0
ENSG00000242444	AC007207.1	0	0.0838443	0	0	0	0
ENSG00000242329	AC007215.1	0	0	0	0	0	0
ENSG00000277458	AC007216.5	0	0.0384954	0	0	0.229605	0.448278
ENSG00000260764	AC007224.1	0	0	0	0	0.551268	0
ENSG00000260782	AC007225.1	0.0207269	0	0	0	0	0
ENSG00000261725	AC007225.2	0	0	0	0	0	0
ENSG00000268036	AC007228.1	0	0.272889	0	0	0	0.516253
ENSG00000267544	AC007229.1	0.11755	0	0	0	0.24937	0.248554
ENSG00000226230	AC007237.1	0	0	0	0	0	0
ENSG00000231043	AC007238.1	0.0256948	0.0674815	0	0.0559028	0	0.0595602
ENSG00000282909	AC007241.1	0	0	0	0	0	0
ENSG00000235653	AC007253.1	0	0	0	0	0.0853602	0
ENSG00000270196	AC007255.2	0	0	0	0	0	0
ENSG00000213090	AC007256.1	0.0485779	0.0645899	0.14859	0.0359502	0.0683462	0
ENSG00000271656	AC007262.1	0	0	0	0	0	0
ENSG00000223422	AC007274.1	0	0	0	0	0	0
ENSG00000236690	AC007274.2	0	0	0	0	0	0
ENSG00000275280	AC007274.3	0	0	0	0	0	0
ENSG00000278854	AC007275.1	0	0	0	0	0.308311	0
ENSG00000230799	AC007279.1	0.0355417	0	0.231016	0	0.148492	0.238441
ENSG00000235579	AC007283.2	0	0	0	0	0	0
ENSG00000224946	AC007312.1	0	0	0	0	0	0
ENSG00000172974	AC007318.1	0.611921	0.381517	135102	0.680827	0.651511	14086
ENSG00000273763	AC007318.2	252798	198167	114738	0	107106	23241
ENSG00000227444	AC007322.1	0	0	0	0	0	0
ENSG00000229725	AC007322.2	0	0	0	0	0	0
ENSG00000237968	AC007322.3	0	0	0	0	0	0
ENSG00000251618	AC007322.4	0	0	0	0	0	0
ENSG00000276017	AC007325.1	0.0260137	0	0	0	0	0
ENSG00000277196	AC007325.2	108849	111922	114513	143959	146308	149727
ENSG00000278573	AC007325.3	0.216297	0	0	0	0	0
ENSG00000278817	AC007325.4	69824	488737	634334	43669	672291	69393
ENSG00000271275	AC007326.1	0.490774	0.715233	0.932955	0.664543	0.772211	0.966243
ENSG00000283583	AC007326.3	0	0.256717	0	0.859076	0	0
ENSG00000283809	AC007326.4	438062	395143	430588	466591	488732	496324
ENSG00000228770	AC007327.1	0	0	0	0	0	0
ENSG00000259962	AC007342.2	0	0	0	0	0	0
ENSG00000260078	AC007342.3	0.254351	0.374671	0.153924	0.322425	0.177608	0.581008
ENSG00000260258	AC007346.1	0	0	0	0	0	0
ENSG00000260939	AC007346.2	0	0	0	0	0.0919436	0
ENSG00000280454	AC007347.2	0	0	0	0	0	0
ENSG00000270677	AC007363.1	0	0	0	0	0	0
ENSG00000227791	AC007365.2	0	0	0	0	0	0
ENSG00000258552	AC007375.1	0	0.0901896	0	0.153297	0	0
ENSG00000259164	AC007375.2	0	0	0	0	0	0
ENSG00000258566	AC007376.1	0	0	0	0	0	0
ENSG00000159186	AC007383.1	0	0	0	0	0	0
ENSG00000283995	AC007383.6	280735	0.807825	262375	346044	0.631763	335831
ENSG00000227394	AC007386.1	0.501472	0.409768	0.561589	0.554658	0.528744	0.142858
ENSG00000224646	AC007387.1	0	0	0	0	0	0
ENSG00000223739	AC007389.2	0	0	0	0.875271	0	0
ENSG00000237979	AC007389.4	0.197514	0.152472	0	0.0859584	0.0828242	0.17791
ENSG00000233159	AC007390.1	0.218497	0	0	0	0	0
ENSG00000223604	AC007394.1	0	0	0	0	0	0
ENSG00000231386	AC007395.1	0	0	0	0	0	0
ENSG00000257501	AC007424.1	0.392544	0.299984	0.280656	0.373931	0.346199	0.361668
ENSG00000227187	AC007435.1	0	0	0	0	0	0
ENSG00000264093	AC007448.1	0	0	0	0	0	0
ENSG00000274551	AC007450.2	0	0	0	0	0	0
ENSG00000277705	AC007450.3	0	0	0.312134	0	0	0
ENSG00000278654	AC007450.4	0	0.0763885	0.151245	0	0.125737	0
ENSG00000256708	AC007458.1	0	0	0	0	0	0
ENSG00000260012	AC007494.1	0.0891083	0.523224	0.0971272	0.581091	0.151951	0.496202
ENSG00000255356	AC007536.1	0	0	0	0	0	0
ENSG00000198134	AC007537.1	0.0509931	0	0.112705	0	0.107638	0
ENSG00000242405	AC007537.2	0.079472	0	0	0.0879397	0.0839384	0
ENSG00000280475	AC007537.3	0.079472	0	0	0.0879397	0.0839384	0
ENSG00000281442	AC007537.4	0.0509931	0	0.112705	0	0.107638	0
ENSG00000284335	AC007537.5	0.419515	0.344958	0.472276	0.116007	0.332085	0.357598
ENSG00000213155	AC007547.1	0.0826401	0	0	0	0	0
ENSG00000239805	AC007547.2	0.186375	0	0.207377	0	0	0
ENSG00000232736	AC007551.1	0.0818841	0.106323	0	0.181951	0	0.184253
ENSG00000274328	AC007551.2	0	0	0	0	0	0
ENSG00000256450	AC007552.1	0	0	0	0	0	0
ENSG00000235993	AC007559.1	0	0	0	0	0	0
ENSG00000238165	AC007560.1	0	0	0.335282	0	0	0
ENSG00000235583	AC007562.1	0	0	0	0	0	0
ENSG00000237930	AC007563.3	0	0.145134	0.245294	0	0	0
ENSG00000270453	AC007566.2	0	0	0	0	0	0
ENSG00000224136	AC007568.1	0	0	0	0.169932	0.162638	0
ENSG00000259866	AC007599.1	0	0	0	0	0	0
ENSG00000283365	AC007603.3	0	0.0438771	0	0	0	0
ENSG00000261835	AC007610.3	0.0431017	0.0558484	0	0.0948978	0	0.194422
ENSG00000203648	AC007618.1	0	0.0676625	0	0	0	0
ENSG00000271370	AC007619.2	0	0	0	0	0	0.130482
ENSG00000281168	AC007619.3	0	0	0	0	0	0.130482
ENSG00000239255	AC007620.1	0	0	0	0	0	0
ENSG00000270857	AC007621.1	0	0	0	0	0.0945951	0
ENSG00000281874	AC007621.2	0	0	0	0	0.0945951	0
ENSG00000240441	AC007622.1	107367	122603	0.482027	0.943218	0.904912	193983
ENSG00000161132	AC007663.1	0.333231	0.619774	0.485455	0.445149	0.320376	0.848259
ENSG00000283582	AC007671.2	0	0.210287	0	0	0.169555	0.183898
ENSG00000226297	AC007677.1	0	0	0	0	0	0
ENSG00000213739	AC007679.1	0	0	0	0	0	0
ENSG00000237041	AC007679.3	0	0	0.100641	0	0	0
ENSG00000283134	AC007679.4	0	0	0	0	0	0
ENSG00000283641	AC007679.6	0	0	0.100641	0	0	0
ENSG00000224415	AC007683.1	0	0	0	0	0	0
ENSG00000182888	AC007685.1	0	280528	0	0	0	0
ENSG00000243225	AC007686.1	0	0	0	0	0.159389	0.17153
ENSG00000241352	AC007688.1	0.157881	0	0.11762	0	0	0
ENSG00000233565	AC007690.1	0	0	0	0	0	0
ENSG00000278256	AC007718.1	0	0	0	0	0	0
ENSG00000215493	AC007731.2	119472	123597	100216	111859	121578	106481
ENSG00000277971	AC007731.5	0	0	0	0	0	0
ENSG00000229087	AC007738.1	0	0	0	0	0	0
ENSG00000225896	AC007742.1	0	0	0	0	0	0
ENSG00000275578	AC007742.2	0	0	0	0	0	0
ENSG00000254644	AC007751.1	0	0.158621	0.275203	0	0.256798	0
ENSG00000255105	AC007751.2	0	0.156003	0	0	0	0
ENSG00000268053	AC007785.2	0.0228556	0.03022	0	0	0	0.0515937
ENSG00000226205	AC007790.1	0	0	0.123945	0.242255	0	0
ENSG00000256351	AC007834.2	0	0.198967	0	0.678467	0.319497	103139
ENSG00000269069	AC007842.1	126372	100135	145082	112009	0.964268	11784
ENSG00000281233	AC007842.2	126372	100135	145082	112009	0.964268	11784
ENSG00000244381	AC007849.2	0.0713608	0.0929567	0	0.314282	0	0
ENSG00000233870	AC007881.1	0	0	0	0	0	0
ENSG00000224891	AC007899.1	0.118605	0.155987	0	0	0	0
ENSG00000277639	AC007906.2	0.532694	121427	0.976443	0.824604	0.334074	118927
ENSG00000278510	AC007908.1	0	0	0	0	0	0
ENSG00000224611	AC007919.1	0	0	0	0	0	0
ENSG00000231384	AC007919.2	0	0	0	0	0	0
ENSG00000265863	AC007923.2	0.0796314	0.0344587	0.119081	0.117344	0	0.238709
ENSG00000266448	AC007923.3	0	0	0	0	0	0
ENSG00000258510	AC007954.1	0	0.365169	0.212622	0.207069	0	0.208033
ENSG00000258439	AC007956.1	0.725177	0.606402	103031	0.717578	0.551614	0.592689
ENSG00000173357	AC007967.1	0	0	0	0	0	0
ENSG00000228207	AC007967.2	0	0	0	0	0	0
ENSG00000230025	AC007967.3	0	0	0	0	0	0
ENSG00000273731	AC007967.4	0	0	0	0	0	0
ENSG00000233762	AC007969.1	0.67344	0.614355	0.393452	0.407424	0.593021	0.827433
ENSG00000234061	AC007969.2	0.252079	0.331187	0	0	0.526548	0
ENSG00000253790	AC007991.1	0	0	0	0	0	0
ENSG00000183663	AC007992.1	0	0	0	0	0	0
ENSG00000271349	AC007992.2	0	0	0	0	0	0
ENSG00000267166	AC007993.1	0.0144463	0	0.0605147	0.0319051	0.0880803	0.101207
ENSG00000239683	AC007998.1	0	0	0	0	0	0
ENSG00000267140	AC007998.2	0	0.112379	0	0	0.347653	0.199722
ENSG00000256378	AC008011.1	0	0	0	0	0	0
ENSG00000226472	AC008013.1	505618	468082	537145	440812	412772	744473
ENSG00000256984	AC008013.2	138074	130277	0.811576	160444	17433	104719
ENSG00000270926	AC008013.3	0.501189	0.275932	0.647661	0.186028	0.449534	0.287934
ENSG00000258578	AC008015.1	0	0	0	0	0	0
ENSG00000235297	AC008021.1	0.210308	0.107153	0.178967	0.367838	0.35346	0.187556
ENSG00000239246	AC008026.1	0.466271	0.403069	0	0.509815	0.218019	0.380764
ENSG00000239809	AC008026.2	0	0	0	0	0	0
ENSG00000256075	AC008033.1	0	0.0522161	0	0	0	0
ENSG00000256917	AC008033.2	0	0	0	0	0	0
ENSG00000283041	AC008038.1	121676	0.290245	0.799485	190156	0.931513	0.491464
ENSG00000242583	AC008040.2	0.0984219	0	0	0	0	0.111625
ENSG00000244039	AC008040.3	0	0.0368557	0	0	0	0
ENSG00000244193	AC008040.4	0.0850302	0	0.278081	0.0921579	0.0888246	0.284829
ENSG00000257580	AC008055.1	0	0	0	0.136844	0	0
ENSG00000224553	AC008065.1	0	0	0	0	0	0
ENSG00000253793	AC008066.1	0.436634	0.384013	0.330595	0	0	0.442446
ENSG00000224604	AC008069.1	0	0	0	0	0	0
ENSG00000228681	AC008072.1	152292	135744	175928	148583	15641	132122
ENSG00000276087	AC008073.3	189326	196027	184772	0.930887	199757	204692
ENSG00000237217	AC008074.2	0	0.404213	0.169397	0	0	0
ENSG00000258116	AC008083.2	0.0821112	0	0.5491	0	0.172309	0
ENSG00000271596	AC008121.1	0.127726	0	0.284856	0.280289	0.271833	0.292367
ENSG00000258204	AC008126.1	0	0	0	0	0	0
ENSG00000257572	AC008127.2	0	0	0	0	0	0
ENSG00000161103	AC008132.1	134831	104995	0.788115	0.707617	130857	0.482346
ENSG00000239989	AC008132.2	0	0	0	0	0.559025	0.94765
ENSG00000234594	AC008134.1	0	0	0	0	0	0
ENSG00000257531	AC008147.3	0.105648	0	0	0	0	0
ENSG00000278842	AC008147.4	0	0	0.109097	0	0	0.106374
ENSG00000213237	AC008155.1	0	0	0	0	0	0
ENSG00000213238	AC008155.2	0	0	0	0	0	0
ENSG00000266066	AC008158.1	0.00889418	0.0115692	0	0.0199262	0.0191681	0
ENSG00000271346	AC008162.1	0	0	0	0	0	0
ENSG00000278646	AC008162.2	0	0.413372	0	0	0	0
ENSG00000233491	AC008163.1	0	0	0	0.06742	0	0
ENSG00000223890	AC008171.1	0.159088	0	0	0	0	0
ENSG00000231570	AC008173.1	0	0	0	0	0	0
ENSG00000273589	AC008175.2	0	0	0	0	0	0
ENSG00000224545	AC008264.1	0	0	0	0	0	0
ENSG00000179342	AC008267.1	0.0917316	0.0389544	0.326392	0.331145	0.127822	0.0685064
ENSG00000230189	AC008267.2	108544	0.972468	0.753916	0.563068	103958	120756
ENSG00000234500	AC008267.3	0.760853	0.778838	0.485928	0.874904	0.56427	0.446481
ENSG00000236928	AC008267.4	0.139407	0	0	0.152683	0	0
ENSG00000244510	AC008267.5	115295	273442	0.886414	129114	0.816	132922
ENSG00000244657	AC008267.6	117254	151329	0.92136	0	166298	0
ENSG00000270893	AC008277.2	0	0	0	0	0.117151	0
ENSG00000235937	AC008280.1	0	0	0	0	0	0
ENSG00000241114	AC008280.2	0.441354	0.317514	0.826868	0.846962	0.503851	0.433746
ENSG00000241187	AC008379.1	0	0	0	0	0	0
ENSG00000270904	AC008385.1	0	0	0	0	0	0
ENSG00000284099	AC008393.2	0	0	0	0	0	0
ENSG00000268465	AC008403.1	0.260553	0.461849	0	0.257732	0	0.505711
ENSG00000253261	AC008410.1	0	0.137828	0	0	0	0
ENSG00000254200	AC008412.1	0	0.14524	0	0	0	0
ENSG00000248293	AC008413.1	0	0	0	0	0	0
ENSG00000249068	AC008417.1	0	0	0	0	0.161574	0
ENSG00000251583	AC008427.1	0	0	0	0	0	0
ENSG00000253785	AC008429.2	0	0	0.113165	0	0.10676	0
ENSG00000254328	AC008429.4	0	0.238858	0	0	0	0
ENSG00000273569	AC008432.1	0	0.0466579	0	0	0	0
ENSG00000274525	AC008443.7	0	153383	0.444135	0	0	0
ENSG00000253600	AC008446.1	0	0	0	0	0	0
ENSG00000274106	AC008463.1	0	0	0.268059	0	0	0
ENSG00000213303	AC008481.1	0.187477	869396	0.618191	0	0.254465	0.209125
ENSG00000213304	AC008481.2	0.247545	0.403127	0.530003	0.271158	0.517072	0.41507
ENSG00000267477	AC008481.3	0	0.0967683	0.218872	0	0.208549	0
ENSG00000253946	AC008489.1	0	0	0	0	0	0
ENSG00000243304	AC008494.1	0.0757945	0.0981952	0.0817381	0.0822916	0.0792507	0
ENSG00000238254	AC008496.1	0	0	0	0	0	0
ENSG00000276945	AC008498.1	0.0709973	0.094094	0	0	0.149702	0
ENSG00000266910	AC008507.1	272886	178614	146175	254778	240189	147301
ENSG00000267258	AC008507.3	0	0	0	0	0	0
ENSG00000267692	AC008507.4	237861	158772	336532	0.644861	0.622087	133553
ENSG00000253966	AC008514.2	0.184177	0.199978	0.138252	0.0678464	0.129055	0
ENSG00000267611	AC008521.1	0.247113	0	0	0	0	0
ENSG00000267725	AC008521.2	0	0	0	0	0	0
ENSG00000250705	AC008526.1	0	0	0	0	0	0
ENSG00000268797	AC008537.1	0	0	0.013358	0	0	0
ENSG00000220949	AC008543.2	0	0	0	0	0	0
ENSG00000251118	AC008549.3	0	0	0	0	0	0
ENSG00000234259	AC008550.1	0	0	0	0	0	0
ENSG00000270624	AC008555.4	0	0	0.243585	0	0	0
ENSG00000271666	AC008555.7	0.0648716	0.250615	0	0	0	0
ENSG00000253251	AC008560.1	456575	419304	494707	509189	440289	51028
ENSG00000253512	AC008562.1	0	0	0	0	0	0
ENSG00000251135	AC008565.1	0.602024	0.748682	0	0.273362	0.405392	0.26392
ENSG00000260112	AC008567.1	0.16423	0.246703	0.117917	0.178143	0.120546	0.182821
ENSG00000242080	AC008571.1	0	0	0	0	0	0
ENSG00000258864	AC008575.1	0.312964	0	0	0	0	0
ENSG00000272869	AC008575.2	291973	213797	186445	364731	253672	161505
ENSG00000251000	AC008592.3	0	0.302832	0	0	0.476777	0
ENSG00000271128	AC008608.1	0	0	0	0	0	0
ENSG00000241870	AC008620.1	0	0	0	0	0	0
ENSG00000248560	AC008620.2	0	0.0582428	0	0	0	0
ENSG00000269014	AC008622.1	0	0	0	0	0	0
ENSG00000275862	AC008622.3	0	0	0	0	0	0
ENSG00000270518	AC008626.1	0.152131	0.263893	0.323678	0.808542	0	0.343702
ENSG00000279966	AC008626.2	0	0	0	0	0.303989	0
ENSG00000249433	AC008628.1	0	0	0	0	0	0
ENSG00000249944	AC008628.2	0	0	0	0	0	0
ENSG00000250678	AC008629.2	0.326788	0.105369	0.727842	0.72111	0	0.185572
ENSG00000250928	AC008629.3	0.332139	0.341112	0.291488	0.575057	0.274624	0.4437
ENSG00000248831	AC008638.1	0	0	0	0	0	0
ENSG00000250006	AC008638.2	0	0	0	0	0	0
ENSG00000270669	AC008638.3	0	0.10122	0	0	0	0
ENSG00000253155	AC008676.3	0	0	0	0	0	0
ENSG00000213414	AC008677.1	0	0	0	0	0	0
ENSG00000244331	AC008677.2	0	0	0	0	0	0
ENSG00000253422	AC008677.3	0	0	0	0	0.130003	0
ENSG00000267335	AC008687.1	0.000000273869	0.000000634782	0.0487393	0	0.00000800467	0
ENSG00000268655	AC008687.4	0.192439	0.243452	0.2551	0.594463	0.303996	0.135887
ENSG00000268669	AC008687.5	0	0	0	0	0	0
ENSG00000269706	AC008687.6	0	0	0	0	0	0
ENSG00000283251	AC008687.7	0.431136	0.53587	0.412668	0.667928	0	0.683601
ENSG00000283663	AC008687.8	0	0.287866	0	0.533523	0.330612	0
ENSG00000253798	AC008694.1	0	0	0	0	0	0
ENSG00000254336	AC008694.2	0	0	0	0	0.289294	0
ENSG00000273217	AC008695.1	0	0	0	0	0	0
ENSG00000225869	AC008696.1	0	0.0680431	0	0	0	0
ENSG00000213488	AC008716.1	0	152546	0.18664	0.182506	0	0
ENSG00000250114	AC008723.1	0	0	0	0	0	0
ENSG00000270442	AC008725.1	0	0.0266012	0	0	0.0428838	0
ENSG00000283567	AC008735.6	0.313394	0.376939	0.220992	0.497922	0.480236	0.4193
ENSG00000269419	AC008737.2	0	0	0	0.918114	0	0
ENSG00000269373	AC008739.2	0.129281	0.168214	0	0.284262	0	0.591235
ENSG00000271598	AC008739.3	0	0	0	0	0	0
ENSG00000257403	AC008740.1	0	0	0	0	0	0
ENSG00000276548	AC008740.2	0	0	0	0	0.00900523	0
ENSG00000283512	AC008740.3	0	0.0519364	0	0	0.0838709	0
ENSG00000271150	AC008745.1	0.709144	0.851944	0.828196	0	0.657802	144266
ENSG00000274968	AC008746.2	0	0	0	0	0	0
ENSG00000276551	AC008746.5	0	0	0	0	0	0
ENSG00000268593	AC008749.1	0.0875959	0	0	0.20895	0	0
ENSG00000268711	AC008750.6	0	0	0	0	0	0
ENSG00000269403	AC008750.8	0.122893	0.197758	0.277384	0.280489	0	0.288014
ENSG00000268293	AC008751.1	0	0	0.257824	0	0	0
ENSG00000269236	AC008751.2	0.0473288	0	0.110382	0	0.201411	0
ENSG00000267370	AC008752.3	248817	394588	203759	25845	278533	135838
ENSG00000238150	AC008753.1	0	0	0	0	0	0
ENSG00000196826	AC008758.1	0	155547	0	0	0	0
ENSG00000248406	AC008758.3	0.487768	0.0497377	0.510749	0.241692	0.457283	0.595697
ENSG00000268744	AC008758.4	0.305876	0.639178	0.110651	0.564559	0.215778	0.342783
ENSG00000268870	AC008758.5	0	0	0	0	0	0
ENSG00000269755	AC008758.6	174014	107509	0.712735	158406	0.92411	0
ENSG00000267490	AC008759.1	0	0	0	0.0969024	0	0
ENSG00000268400	AC008763.2	0.547368	167245	243838	159904	224871	151959
ENSG00000269711	AC008763.3	0.261423	1877	192004	319165	0	450508
ENSG00000141979	AC008764.1	0	0	0	0	0.0706947	0
ENSG00000268790	AC008764.4	0.182369	159889	0	0.0000000094296	0	665465
ENSG00000257355	AC008770.2	0.535805	0.337453	0	125798	0	0
ENSG00000267179	AC008770.3	0.217508	0.297396	0.43895	0	10565	0.550663
ENSG00000270779	AC008782.1	0	0	0	0	0	0
ENSG00000267433	AC008798.1	0	0	0	0	0	0
ENSG00000240388	AC008799.1	0	278567	0	0.162756	0.157208	0
ENSG00000254170	AC008802.1	0.107689	0	0	0.236666	0	0.121205
ENSG00000267245	AC008805.1	0	0	0	0	0	0
ENSG00000255875	AC008813.1	0.0713795	0.0456781	0	0	0.074577	0
ENSG00000271257	AC008814.1	0	0	0	0	0	0
ENSG00000251478	AC008817.1	0	0.210361	0	0	0	0
ENSG00000270495	AC008825.2	0	0	0	0	0	0
ENSG00000276214	AC008833.1	0.214624	0.141315	0.119704	0	0	0
ENSG00000249101	AC008834.1	0	0	0	0	0	0
ENSG00000248236	AC008837.1	0	0	0	0	0	0
ENSG00000248928	AC008837.2	0	0	0	0	0	0
ENSG00000227836	AC008850.1	0.126684	0	0	0	0	0.288872
ENSG00000248288	AC008868.1	0	0	0	0	0	0.250547
ENSG00000267952	AC008878.1	68801	826919	817679	787005	673497	474437
ENSG00000268614	AC008878.2	0	0	0	0	0	0
ENSG00000268861	AC008878.3	0	0.37717	0	0	0	0
ENSG00000248105	AC008885.1	0	0	0	0	0	0
ENSG00000242198	AC008897.1	0.816702	0.666299	0	0.224473	0	0.683497
ENSG00000249092	AC008945.1	0	0	0	0	0	0
ENSG00000242602	AC008953.1	0.241508	0.316919	0	0	0	0.813452
ENSG00000251648	AC008958.1	0	0.0615316	0	0	0	0
ENSG00000271299	AC008962.1	0	0	0	0	0	0
ENSG00000251099	AC008967.1	0	0	0	0	0.488467	0
ENSG00000268083	AC008982.1	0.0744652	0	0	0	0	0
ENSG00000282832	AC008982.3	0.0744652	0	0	0	0	0
ENSG00000274785	AC008984.1	0	0	0	0	0	0
ENSG00000275951	AC008984.3	0	0	0	0	0	0
ENSG00000276466	AC008984.4	0	0	0	0	0	0
ENSG00000278402	AC008984.5	0	0	0	0	0	0
ENSG00000271824	AC009014.1	0.113553	0.0962601	0.276554	0	0.237096	0.0422459
ENSG00000241183	AC009022.1	0	0	0	0	0	0
ENSG00000271129	AC009027.1	0	0	0	0	0	0
ENSG00000214331	AC009053.1	290702	295228	358289	221501	328526	277663
ENSG00000276822	AC009053.4	12673	118364	125842	464127	620712	122841
ENSG00000261145	AC009060.2	0	0	0	0	0	0
ENSG00000261774	AC009075.2	0	0	0.308439	0	0	0
ENSG00000213318	AC009078.1	0	0	0	0	0	0
ENSG00000240338	AC009078.2	0.308915	0.703012	0.342132	0.439113	0.355075	0.629451
ENSG00000260514	AC009086.1	0	0	0	0	0	0
ENSG00000277669	AC009086.2	0	0	0	0	0	0
ENSG00000263343	AC009088.4	0	0	0	0	0	0
ENSG00000273843	AC009091.1	0	0	0	0	0	0
ENSG00000260908	AC009093.3	0.303863	0.266521	0.17705	0.0931494	0.254443	0.280926
ENSG00000261278	AC009094.1	0	0.614852	0	0	0	0
ENSG00000260068	AC009101.2	0	0	0	0	0	0
ENSG00000260187	AC009101.3	0.153227	0	0	0	0	0
ENSG00000243697	AC009108.1	116919	0.78823	123237	0.966619	0.253867	0.363345
ENSG00000259873	AC009117.1	0	0	0	0	0	0
ENSG00000260300	AC009119.2	381528	231982	254318	338692	604722	284498
ENSG00000239763	AC009120.1	365507	290685	342327	349836	385042	327372
ENSG00000260471	AC009120.3	0	0	0	0	0	0
ENSG00000283755	AC009122.1	0.0290541	0	0	0	0.061338	0
ENSG00000242176	AC009127.1	0	0	0	0	0	0
ENSG00000263311	AC009127.3	0.72373	0.136417	0.461956	0	0.217416	0.469983
ENSG00000261458	AC009132.1	0	0	0	0	0	0
ENSG00000280893	AC009133.6	0	0	0.229716	0	0	0
ENSG00000284106	AC009136.2	0	0	0	0	0.398203	0.398479
ENSG00000240861	AC009153.1	0	0	0	0.143498	0	0
ENSG00000237901	AC009161.1	0	0	0	0	0	0
ENSG00000260092	AC009163.2	0.246857	0	0.0332695	0	0.221168	0.152817
ENSG00000261717	AC009163.4	0.293818	0.706108	0.687769	0	0.61974	0.22763
ENSG00000262583	AC009163.5	336542	302539	383348	248839	375972	239702
ENSG00000261178	AC009169.1	0	0	0	0	0	0
ENSG00000262471	AC009171.1	0	0	0	0	0	0
ENSG00000228360	AC009220.1	0.274627	0.180357	0	0.600925	0.576341	0.621677
ENSG00000239254	AC009220.2	0.149105	0.22077	0.0510834	0.0512782	0	0.160812
ENSG00000271537	AC009220.3	0.291128	0.772148	132014	0.646164	0.919865	0.497356
ENSG00000274837	AC009233.1	0	0	0	0	0	0
ENSG00000223917	AC009237.1	0	0	0	0	0	0
ENSG00000237308	AC009237.10	0	0	0	0	0	0
ENSG00000238162	AC009237.11	0	0	0	0	0	0
ENSG00000270193	AC009237.12	0	0.0741838	0	0	0	0
ENSG00000271003	AC009237.13	0	0	0	0	0	0
ENSG00000274028	AC009237.16	0	0	0	0	0	0
ENSG00000275497	AC009237.17	0	0	0	0	0	0
ENSG00000224719	AC009237.2	0	0	0	0	0	0
ENSG00000229689	AC009237.3	0.0328199	0.0423824	0	0.307775	0.113819	0.120404
ENSG00000230083	AC009237.4	0	0	0	0	0	0
ENSG00000233037	AC009237.5	0	0.10192	0	0	0	0
ENSG00000235959	AC009237.6	0	0	0	0	0	0.110257
ENSG00000236026	AC009237.7	0	0	0	0	0	0
ENSG00000236431	AC009237.8	0	0	0	0	0	0
ENSG00000236750	AC009237.9	0	0	0	0	0	0
ENSG00000227120	AC009238.1	0	0	0	0	0	0.110257
ENSG00000233275	AC009238.2	0	0	0	0	0	0
ENSG00000248821	AC009238.3	0	0	0	0	0	0
ENSG00000238072	AC009244.1	842573	22178	448607	453032	753567	0.714069
ENSG00000230383	AC009245.1	0.219348	0.204907	0	0.360806	0.559706	0
ENSG00000257738	AC009248.1	0	0	0	0	0	0
ENSG00000234639	AC009263.1	0	0	0	0	0	0
ENSG00000259505	AC009268.1	0	0	0	0	0	0
ENSG00000235420	AC009269.1	0	0	0	0	0	0.148267
ENSG00000259452	AC009269.2	0	0	0	0	0	0
ENSG00000280754	AC009286.1	0.0116072	0	0	0	0	0
ENSG00000281326	AC009286.2	0	0	0	0	0	0
ENSG00000281536	AC009286.3	0	0	0	0	0	0
ENSG00000228085	AC009296.1	0	0	0	0	0	0
ENSG00000225813	AC009299.1	0.811138	141221	0.437267	0.798138	144444	0.455562
ENSG00000232320	AC009299.2	0	0	0	0	0	0
ENSG00000233868	AC009302.1	0.209438	0	0	0	0	0
ENSG00000224967	AC009303.1	0.101469	0	0.227558	0	0.214002	0
ENSG00000225911	AC009310.1	0	0	0	0	0	0
ENSG00000232337	AC009313.2	0	0.0291938	0	0	0.0469354	0
ENSG00000271081	AC009314.1	0	0	0	0	0	0.281959
ENSG00000236182	AC009319.1	0	0	0	0	0.213292	0.114667
ENSG00000278500	AC009336.2	605257	62505	833776	636779	47943	674854
ENSG00000233287	AC009362.1	0	0	0	0	0	0
ENSG00000236533	AC009413.1	0	132179	0	0	0	0
ENSG00000233752	AC009414.1	0	0	0	0	0	0
ENSG00000278476	AC009414.3	0	0	0	0	0	0
ENSG00000284242	AC009452.1	0.262043	0.689145	0	0.145011	0.275645	0
ENSG00000224071	AC009474.1	0	0	0	0	0	0
ENSG00000230355	AC009474.2	0	0	0	0	0	0
ENSG00000225448	AC009477.1	0	0	0	0.262072	0	0
ENSG00000284479	AC009477.2	0	0	0	0	0	0
ENSG00000229143	AC009480.2	0	0	0	0	0	0
ENSG00000226121	AC009487.2	0.172089	0.1772	0.176091	0.145737	0.207758	0.160184
ENSG00000216844	AC009494.1	0	0	0	0	0	0
ENSG00000236748	AC009500.1	0	0	0	0	0	0
ENSG00000232403	AC009501.2	0	0.459315	0	0	0	0
ENSG00000270437	AC009501.3	0	0	0	0	0	0
ENSG00000231802	AC009502.2	0	0	0	0	0	0
ENSG00000225369	AC009506.2	0	0	0	0	0	0
ENSG00000256557	AC009509.3	0	0	0	0	0	0
ENSG00000224469	AC009517.1	0	0	0	0	0	0
ENSG00000233263	AC009518.2	0	0.237191	0	0.134622	0.127239	0
ENSG00000236386	AC009518.3	0.158326	0	0	0.348244	0.332993	0
ENSG00000111788	AC009533.1	147767	141026	184662	168098	158618	191384
ENSG00000255753	AC009533.2	0.100593	0.142738	0	0	0.393432	0
ENSG00000226066	AC009541.1	0	0	0	0	0	0
ENSG00000276067	AC009542.2	0	0	0	0	0	0.0638609
ENSG00000249692	AC009567.2	0	0	0	0	0	0
ENSG00000270328	AC009597.2	0	0	0	0	0	0
ENSG00000254725	AC009643.1	0	0	0	0	0	0
ENSG00000271028	AC009643.2	0	0	0	0	0	0
ENSG00000250494	AC009646.1	0	0	0	0	0	0
ENSG00000259186	AC009660.1	0	0.0617659	0	0	0	0
ENSG00000260729	AC009690.1	139153	206012	228467	16348	157878	161754
ENSG00000273025	AC009690.3	0	0	0	0	0	0
ENSG00000261281	AC009712.1	0	0	0	0	0	0
ENSG00000257281	AC009729.1	0	0	0	0	0	0
ENSG00000257384	AC009779.1	0	0.532046	0	0.226615	0.434741	0
ENSG00000258311	AC009779.3	313749	351923	347417	453705	287682	320114
ENSG00000258907	AC009779.4	0	0	0	0	0	0
ENSG00000270458	AC009779.6	0	0	0	0	0	0
ENSG00000272837	AC009779.7	0	0	0	0	0	0
ENSG00000272937	AC009779.8	0	0	0	0	0	0
ENSG00000236503	AC009784.1	0	0	0	0	0	0
ENSG00000248911	AC009800.1	0	0	0	0	0	0
ENSG00000274879	AC009804.1	0	0	0	0	0	0
ENSG00000253760	AC009812.2	0	0	0.197731	0	0	0
ENSG00000265273	AC009831.2	0.0234261	0	0	0	0	0
ENSG00000266105	AC009831.3	0	0	0	0	0	0
ENSG00000261679	AC009852.2	0	0	0	0	0	0
ENSG00000253623	AC009879.1	0.323597	0.199044	0.327737	0.299772	0.418829	0.187011
ENSG00000270255	AC009884.2	0	0	0	0	0	0
ENSG00000276983	AC009892.2	0	0	0	0	0	0
ENSG00000278826	AC009892.3	0	0	0	0	0	0
ENSG00000248978	AC009901.1	0	0	0	0	0	0
ENSG00000254212	AC009901.2	0	0.171928	0	0	0.275275	0
ENSG00000254014	AC009902.1	0	0	0	0	0	0
ENSG00000250031	AC009927.1	0.153662	0.0578205	0.0489771	0.0484591	0.18456	0.19833
ENSG00000254103	AC009927.2	0	0	0	0	0	0
ENSG00000234356	AC009945.1	0	0	0	0	0	0
ENSG00000230073	AC009947.1	0	0	0	0	0	0
ENSG00000236647	AC009947.2	0	0	0	0	0	0
ENSG00000238082	AC009948.2	0.516845	0.486103	0.205688	0.306025	0.296151	0.319152
ENSG00000283451	AC009950.2	0	0	0	0	0	0
ENSG00000227055	AC009961.2	0	0	0	0	0	0
ENSG00000230783	AC009961.3	0.239904	0.158326	0.136297	0	0.126061	0
ENSG00000227270	AC009963.1	0	0	0	0	0	0
ENSG00000233494	AC009963.2	0.745224	0.965661	108785	107897	0.524397	0.564102
ENSG00000235325	AC009963.3	0.0761372	0.0990857	0	0	0	0
ENSG00000237745	AC009963.4	0	0	0	0	0	0
ENSG00000235951	AC009965.2	0	0	0	0	0	0
ENSG00000214369	AC009967.1	0.275982	0.470362	0.198822	0.702393	0.285523	0.204421
ENSG00000234932	AC009969.1	0	0	0	0	0	0
ENSG00000267793	AC009977.1	0	0	0	0	0	0
ENSG00000271779	AC009994.1	0	0	0	0	0	0
ENSG00000259369	AC009997.1	0	0	0	0	0	0
ENSG00000226918	AC010086.1	0	0	0	0	0	0
ENSG00000236615	AC010086.2	0	0	0	0	0	0
ENSG00000276362	AC010087.1	0	0	0	0	0	0
ENSG00000233648	AC010095.1	0	0.368425	0	0	0	0
ENSG00000213291	AC010099.1	0	0	0	0	0	0
ENSG00000227847	AC010099.2	0	0.134862	0	0.22685	0	0.230033
ENSG00000234071	AC010099.3	0	0	0	0	0.469284	0
ENSG00000234983	AC010132.2	0.564211	0	0	0.0120945	0	0
ENSG00000256646	AC010132.3	163979	127412	132773	130041	13371	145192
ENSG00000274282	AC010133.1	0	0	0	0	0	0
ENSG00000227989	AC010141.1	0	0	0	0	0	0
ENSG00000228257	AC010141.2	0	0	0	0	0	0
ENSG00000242393	AC010141.3	0	0	0	0	0	0
ENSG00000283202	AC010149.2	0	0	0	0	0	0
ENSG00000240566	AC010153.1	0	0	0	0	0	0
ENSG00000235895	AC010154.1	0	0	0	0	0	0
ENSG00000257611	AC010182.1	0	0	0	0	0.0387372	0
ENSG00000256594	AC010186.2	520423	531534	560523	430305	486038	483312
ENSG00000258118	AC010198.2	0	0	0	0	0.397915	0
ENSG00000257803	AC010200.1	0	0	0	0	0	0
ENSG00000271177	AC010200.2	0	0	0	0	0	0
ENSG00000257254	AC010202.1	0	0	0	0	0	0
ENSG00000257489	AC010203.1	100399	102663	0.185791	0.972611	0.728379	163078
ENSG00000244019	AC010234.1	0	0	0	0	0	0
ENSG00000229738	AC010240.1	0	0	0	0	0	0
ENSG00000235253	AC010240.2	0.125053	0.0815209	0.208865	0	0.065293	0.13993
ENSG00000250803	AC010255.3	0	0.029299	0.0877812	0	0	0.0505732
ENSG00000248350	AC010265.1	0	0	0	0	0	0
ENSG00000242979	AC010285.1	0.0997019	0	0	0	0.208867	0.224671
ENSG00000249876	AC010285.3	0.175176	0.453953	0	0	0	0
ENSG00000260865	AC010287.1	0	0	0.204079	0	0	0
ENSG00000241179	AC010301.1	0	0.153857	0	0	0	0
ENSG00000253213	AC010306.1	0.0399458	0.0526107	0	0	0.168751	0.0910093
ENSG00000240611	AC010307.1	0	0	0	0	0	0
ENSG00000254503	AC010319.1	0.350017	0.300014	0.485045	0.140663	0.460193	0.223823
ENSG00000269035	AC010319.2	0	0	0	0	0	0
ENSG00000277562	AC010320.5	0.0653335	0.086071	0	0	0.137488	0
ENSG00000167774	AC010323.1	0.695141	319814	346143	0	10871	123219
ENSG00000268884	AC010323.2	0.0716263	0.378907	0.481374	0.318847	0.30378	0.163084
ENSG00000261341	AC010325.1	190316	237588	0.633042	246203	236712	0.813403
ENSG00000243234	AC010326.1	0.638477	0.377322	0.642594	0.253014	0.487871	0.131683
ENSG00000269476	AC010326.2	0.336159	0.0642865	0.144562	0.34547	0	0
ENSG00000270804	AC010326.4	821155	876092	948962	783281	781252	973532
ENSG00000267110	AC010327.1	0	0	0	0	0	0
ENSG00000267507	AC010327.2	0.229249	0	0	0	0	0.343582
ENSG00000268282	AC010328.2	0.0319481	0	0	0	0.0668657	0
ENSG00000269779	AC010329.2	0.270268	0.286377	0.122992	0.149724	0.217898	0.137901
ENSG00000275321	AC010329.3	0.0302782	0.0309157	0.0438672	0	0	0.105019
ENSG00000280171	AC010329.5	0.0302782	0.0309157	0.0438672	0	0	0.105019
ENSG00000277977	AC010332.1	351267	561333	532016	781124	500565	643809
ENSG00000278543	AC010332.2	0.0506629	0	0	0	0	0
ENSG00000276332	AC010338.1	0	0	0	0	0	0
ENSG00000226432	AC010342.1	0	0.0967416	0	0	0	0
ENSG00000240376	AC010343.1	0	0	0	0.125788	0	0.128038
ENSG00000250672	AC010343.2	0	0	0	0	0	0
ENSG00000250847	AC010350.1	0	0	0	0	0	0
ENSG00000250886	AC010368.1	0	0	0	0	0	0.154305
ENSG00000233787	AC010374.1	0	0	0	0	0	0
ENSG00000249744	AC010374.2	0	0	0	0	0	0
ENSG00000253801	AC010376.1	0	0	0	0	0	0
ENSG00000275506	AC010378.1	0.458731	0	0	0	0	0.258225
ENSG00000226400	AC010385.1	0	0	0	0	0	0
ENSG00000271035	AC010385.2	0	0	0	0	0	0
ENSG00000277878	AC010385.3	0	0	0	0	0	0
ENSG00000251627	AC010395.2	0	0	0	0	0	0
ENSG00000242307	AC010401.1	0	0.134507	0	0	0	0
ENSG00000213663	AC010409.1	0	0.115778	0	0	0.187484	0
ENSG00000250895	AC010409.2	0	0	0	0	0	0
ENSG00000269242	AC010422.3	0.616096	0.502439	0.620953	0.434176	0.54609	0.134817
ENSG00000269590	AC010422.5	0	0	0	0	0	0
ENSG00000269693	AC010422.6	196591	215934	262316	159554	218893	104555
ENSG00000249577	AC010424.1	120115	114799	877454	109992	537866	105074
ENSG00000214278	AC010442.1	0	0.0639655	0	0	0	0
ENSG00000250645	AC010442.2	0.315112	0.399125	0.335867	0	0	0.353226
ENSG00000249289	AC010460.1	0	0	0	0	0	0
ENSG00000250319	AC010460.2	0	0	0	0	0	0
ENSG00000250332	AC010460.3	0	0	0	0	0	0.0565195
ENSG00000269307	AC010463.1	0	0	0	0	0	0
ENSG00000214784	AC010468.1	0.820983	0.460763	0.788175	154699	0.855665	130162
ENSG00000250728	AC010468.3	0	0	0	0	0	0
ENSG00000224282	AC010469.1	0	0.0939675	0	0	0	0
ENSG00000241739	AC010469.2	0	0	0	0	0	0
ENSG00000253646	AC010476.1	0.0457407	0	0	0	0	0
ENSG00000268225	AC010487.1	595588	554496	51517	580571	530315	533472
ENSG00000283088	AC010487.3	410754	514916	479214	299985	495586	504499
ENSG00000283695	AC010487.4	0	0	0	0	0	0
ENSG00000274345	AC010492.1	0.000796154	0	0	0	0.0166484	0
ENSG00000277080	AC010492.2	0	0	0	0	0	0
ENSG00000213655	AC010493.1	0	0	0	0	0	0
ENSG00000268742	AC010503.3	0	0	0	0	0	0
ENSG00000282051	AC010507.1	0	0	0	0	0.599887	0
ENSG00000282339	AC010507.2	117795	12713	184243	150762	11456	111784
ENSG00000277961	AC010518.1	0	0	0	0	0	0
ENSG00000268750	AC010522.1	105395	201959	170101	228495	162245	248807
ENSG00000267689	AC010525.2	0	0	0	0	0	0
ENSG00000131152	AC010531.1	0.153784	0	0	0.215439	0	125944
ENSG00000243705	AC010531.2	0	0.377107	0	0	0	0
ENSG00000260851	AC010542.3	196933	196178	209061	139885	157571	225279
ENSG00000260332	AC010546.1	0	0	0	0	0	0
ENSG00000260734	AC010547.4	0	0	0	0	0	0
ENSG00000261611	AC010547.5	0.623234	0.915229	0.436861	0.525289	0.510062	127077
ENSG00000262008	AC010547.6	0	0	0	0	0	0
ENSG00000262120	AC010547.7	0	0	0	0	0	0
ENSG00000249904	AC010587.1	0	0.145727	0	0	0	0
ENSG00000249950	AC010587.2	0	0	0	0	0	0
ENSG00000271477	AC010591.1	0	0	0	0	0	0
ENSG00000251374	AC010598.1	0	0.570133	0	0	0	0
ENSG00000262113	AC010614.1	0	0	0	0	0.87582	0
ENSG00000213976	AC010615.1	401305	501787	400612	39845	366179	347866
ENSG00000268731	AC010615.3	0.106769	0	0.240553	0	0.446976	0.241435
ENSG00000269237	AC010615.4	0.803089	0.624238	0.997291	0.210954	114404	0
ENSG00000268041	AC010616.1	12027	163178	190952	139099	134091	131287
ENSG00000243771	AC010618.1	0	0	0.195591	0	0	0.39295
ENSG00000269469	AC010619.1	0	0.111477	0	0	0	0
ENSG00000268892	AC010620.1	0.316195	0.417962	0.20257	0	0.0926494	0.201026
ENSG00000269839	AC010620.2	0	0	0	0	0	0
ENSG00000269540	AC010624.4	0.0946033	0.122084	0.103546	0	0.0991851	0
ENSG00000248867	AC010625.1	0	0	0	0	0	0
ENSG00000248791	AC010627.1	0.252241	0.334338	0.0831542	0.161027	0.304454	0.0817903
ENSG00000242292	AC010631.1	0	0	0	0	0	0
ENSG00000275547	AC010632.3	0	0	0	0	0	0
ENSG00000269794	AC010642.1	0.338853	0.168456	0.338165	0.169993	0.488143	0.17474
ENSG00000269095	AC010646.1	0	0	0.047365	0.320089	0.150868	0.20667
ENSG00000261330	AC010650.1	0.358551	0.283046	0.637948	0.467199	0.449359	0.160718
ENSG00000262140	AC010653.1	0.188573	0.122911	0.106181	0.103998	0.0995247	0
ENSG00000283057	AC010653.3	0.406955	0	0	0	0	0
ENSG00000228700	AC010655.1	0	0	0	0	0	0
ENSG00000272601	AC010655.3	415261	287093	432572	314196	219635	302147
ENSG00000232383	AC010677.1	0	0	0	0	0	0
ENSG00000273863	AC010678.1	0	0	0	0	0	0
ENSG00000241281	AC010683.1	0	0	0	0	0	0
ENSG00000282514	AC010724.1	522747	615739	770718	722385	490164	644116
ENSG00000282755	AC010724.2	0.133901	0	0	0	0	0
ENSG00000213083	AC010731.1	0	0.0572816	0	0	0	0
ENSG00000232713	AC010733.1	0.2782	0.485178	0.820087	0	0.578323	0.413149
ENSG00000271115	AC010738.1	0	0	0	0	0	0
ENSG00000238065	AC010740.1	0	0.0720697	0	0	0	0
ENSG00000255106	AC010768.3	0	0	0	0	0	0
ENSG00000259619	AC010867.1	0	0.0759402	0	0	0	0
ENSG00000225402	AC010878.1	0	0.0513793	0.0886737	0	0	0
ENSG00000227623	AC010881.1	0	0	0	0	0	0
ENSG00000224414	AC010886.1	0.0589709	0.0616315	0.133693	0.138401	0	0.123176
ENSG00000179997	AC010894.1	0	0	0	0	0	0
ENSG00000232479	AC010900.1	0.23548	0.255214	0.229515	0.130948	0.054797	0.0587864
ENSG00000270664	AC010900.2	0	0	0	0	0	0
ENSG00000213774	AC010904.1	0	0.132996	0	0	0	0
ENSG00000267382	AC010928.1	0.179652	0.279562	0.067623	0.0667424	0.189294	0.278158
ENSG00000267400	AC010928.2	0	0	0	0	0	0
ENSG00000267687	AC010928.3	0.0782032	0.304712	0	0	0.163296	0
ENSG00000214702	AC010931.1	0.0000000525376	0	0	0	0.00000163967	0.00000157813
ENSG00000232668	AC010967.3	0	0	0	0	0	0
ENSG00000225840	AC010970.1	545387	32770.5	490855	322655	702512	307806
ENSG00000230237	AC010975.2	0	0	0	0	0	0
ENSG00000277171	AC010975.3	0	0	0	0	0.22802	0
ENSG00000237732	AC010980.1	829442	896731	770039	931685	852072	852661
ENSG00000223428	AC010997.1	0	0	0	0	0	0
ENSG00000230626	AC011005.1	0.0287989	0.0362357	0	0	0.0588512	0.0634184
ENSG00000241102	AC011005.2	0	0	0	0	0	0
ENSG00000241573	AC011005.3	0	0	0	0	0	0
ENSG00000241961	AC011037.1	0	0	0	0	0	0
ENSG00000276256	AC011043.1	234979	216835	215111	213921	191513	196764
ENSG00000278198	AC011043.2	0.192111	0.233446	0.202075	0.230103	0.187171	0.235379
ENSG00000254765	AC011092.1	0	0	0	0	0	0.0558589
ENSG00000273762	AC011155.1	0	0.24302	0	0.408555	0.194377	0.209242
ENSG00000265614	AC011193.2	0	0	0	0	0	0
ENSG00000266561	AC011195.1	0	0	0	0	0	0
ENSG00000266826	AC011195.2	0	0.0321179	0	0	0	0
ENSG00000225253	AC011225.1	0	0	0	0	0	0
ENSG00000232089	AC011233.1	0	0	0	0	0	0
ENSG00000229695	AC011242.1	0	0.0485482	0	0	0	0
ENSG00000271443	AC011247.3	0	0.0904259	0	0	0.14612	0.12261
ENSG00000265402	AC011260.1	0	0	0	0	0	0
ENSG00000259413	AC011270.1	0	0	0	0	0	0
ENSG00000243404	AC011276.1	0.119123	0	0	0	0	0
ENSG00000236015	AC011290.2	0.608543	122794	0.942364	103526	108517	116665
ENSG00000275049	AC011295.1	0.270911	0.502457	16328	0	0	0.811017
ENSG00000282377	AC011295.2	0.66741	0.920303	0.93685	0.69788	0.490041	10026
ENSG00000274977	AC011298.2	0	0	0	0	0	0
ENSG00000276949	AC011298.3	0	0	0	0	0	0
ENSG00000249839	AC011330.1	217309	331253	188696	246578	16017	236838
ENSG00000248109	AC011346.1	0.133754	0.130015	0.0634076	0.0618126	0.0592975	0.222381
ENSG00000249518	AC011352.2	0.0335238	0.0441354	0.0745383	0	0	0.151083
ENSG00000248696	AC011406.1	0	0	0.239191	0	0	0
ENSG00000249363	AC011411.1	0.189698	0.0623809	0.107661	0	0	0
ENSG00000250080	AC011416.1	0	0	0.043201	0	0	0
ENSG00000250956	AC011416.2	0	0	0	0	0	0
ENSG00000271585	AC011416.3	0	0	0	0	0	0
ENSG00000223539	AC011431.1	0	0	0	0	0.287557	0
ENSG00000267589	AC011444.4	0	0.105689	0	0	0	0
ENSG00000224864	AC011447.1	0	275416	0	0	0	0
ENSG00000267220	AC011447.2	0.129993	0	0	0.571676	0.271839	0
ENSG00000267771	AC011447.4	0	0	0	0	0	0
ENSG00000274612	AC011447.5	0	0	0	0	0	0
ENSG00000258674	AC011448.1	146166	170472	237846	177303	209154	152387
ENSG00000270614	AC011451.2	0.66117	107652	0.846105	0.819174	0.622111	133686
ENSG00000269179	AC011452.1	0.963759	0	0	0	0	0.450325
ENSG00000270347	AC011453.2	0	0	0	0	0.0978963	0
ENSG00000269547	AC011455.3	0	0.0902425	0	0.102798	0	0
ENSG00000282835	AC011455.4	0	0.0902425	0	0.102798	0	0
ENSG00000270402	AC011458.1	0.937472	102236	0.400328	0.768514	0.363458	0.58972
ENSG00000271283	AC011458.2	0.340387	0.44568	0	0.371922	0	0.764263
ENSG00000283285	AC011460.1	0.044917	0	0.0512291	0	0.0474437	0
ENSG00000255730	AC011462.1	125456	10176	145518	10.22	153782	110462
ENSG00000268589	AC011467.2	0	0	0	0	0	0
ENSG00000269025	AC011467.4	0	0	0	0	0	0
ENSG00000269316	AC011467.5	0	0.0391206	0	0	0	0
ENSG00000271149	AC011467.6	0	0	0	0	0	0
ENSG00000270248	AC011468.4	140953	161211	342611	111755	126621	159101
ENSG00000267415	AC011471.1	0.118255	29752	0.87143	0	184296	0.940092
ENSG00000284490	AC011471.4	0	0	0	0	0	0
ENSG00000269741	AC011473.4	0	0	0	0.531531	0.316763	0.492921
ENSG00000271010	AC011475.1	0.299463	0.192734	0.241017	0.452492	0.152778	0.184265
ENSG00000243494	AC011476.1	0	0	0	0.811378	0	0
ENSG00000275012	AC011476.5	0	0	0	0	0	0
ENSG00000267419	AC011477.1	249462	237836	270122	301189	298812	351481
ENSG00000267693	AC011477.5	0.425188	0.185722	0	0	0	0
ENSG00000271499	AC011477.6	0.0972413	0.104282	0.104666	0.0709027	0	0.108615
ENSG00000275540	AC011477.7	0.127046	0.190952	0.136964	0.27614	0.17712	0.284475
ENSG00000267748	AC011479.1	0	0.0916331	0	0.793486	143705	0
ENSG00000228674	AC011483.1	0.070028	0.0918449	0	0.152638	0	0
ENSG00000213777	AC011487.1	102117	117861	124719	0.685293	0.747737	151579
ENSG00000268864	AC011487.2	0.116926	0.24535	0.129452	0	0.244472	0.315466
ENSG00000269608	AC011487.3	0	0	0	0	0	0
ENSG00000274892	AC011487.4	0.58055	0.326095	109923	0.847406	0.576401	109736
ENSG00000214347	AC011491.1	0	0.0744683	0	0.74897	0	0
ENSG00000269765	AC011492.1	0	0	0	0	0	0
ENSG00000268100	AC011493.1	0	0.0683523	0.0592232	0	0	0.0592785
ENSG00000268685	AC011494.1	0	0	0	0	0	0
ENSG00000243829	AC011495.1	0.110504	0	0	0	0	0
ENSG00000269374	AC011497.2	172492	176404	139644	179012	168909	168403
ENSG00000167674	AC011498.1	42139	42333	493078	443623	432739	457958
ENSG00000267385	AC011498.5	0.548139	0.215541	0.360372	0.455008	0.247932	0.722462
ENSG00000267408	AC011498.6	0.0633534	0.0809164	0	0	0.132491	0
ENSG00000267157	AC011499.1	0.383821	0	0	0	0.134104	0.42782
ENSG00000269188	AC011500.1	0	0	0	0	0	0
ENSG00000269588	AC011500.2	0	0	0	0	0	0
ENSG00000242411	AC011506.1	0	0	0	0	0	0
ENSG00000167807	AC011511.1	195233	202103	261587	14442	147027	288753
ENSG00000267303	AC011511.4	689139	365602	463874	239191	465164	249761
ENSG00000275984	AC011515.1	0	0.034269	0	0	0	0
ENSG00000268434	AC011530.1	0.728373	0.432903	0	0.281331	0.622046	0
ENSG00000278797	AC011551.1	0.0423973	0.0543379	0.0906131	0	0	0
ENSG00000283376	AC011591.2	0	0	0	0.385525	0.373253	0.100181
ENSG00000257773	AC011595.2	0.0337413	0	0	0	0	0
ENSG00000258193	AC011602.1	0	0	0	0	0	0
ENSG00000277672	AC011603.5	0	0.186871	0.320884	0.313369	0	0
ENSG00000256157	AC011604.1	0	0	0	0	0	0
ENSG00000257046	AC011604.2	0	0	0	0	0	0
ENSG00000198923	AC011611.1	0	0	0	0	0	0
ENSG00000257941	AC011611.5	0.145342	0.167814	0.21238	0.170903	0.21426	0
ENSG00000258091	AC011611.6	0	0	0	0	0	0
ENSG00000271219	AC011626.1	0	0	0	0	0	0
ENSG00000267652	AC011712.1	0	0.282592	0	0	0	0
ENSG00000254305	AC011716.1	166827	114954	0.977484	0.609033	0.819662	0.250772
ENSG00000251203	AC011726.1	0	0	0.129851	0	0	0.131231
ENSG00000227133	AC011742.1	0.0896308	0.118135	0	0.197331	0	0
ENSG00000231655	AC011742.2	0.338822	0	0	0	0.473144	0
ENSG00000235440	AC011742.3	0.0390481	0.1016	0	0.084308	0	0
ENSG00000230603	AC011753.1	0	0	0	0	0	0
ENSG00000233307	AC011753.3	0	0	0	0	0	0
ENSG00000237916	AC011753.4	0.809192	0.898516	179093	126783	193272	129179
ENSG00000259425	AC011767.1	0.881018	177969	146698	194732	0.933136	0.630971
ENSG00000234073	AC011816.1	0	0.105382	0	0.181179	0	0
ENSG00000214917	AC011825.1	0	0	0	0	0	0
ENSG00000264242	AC011840.4	0.0511741	0.132753	0.11212	0	0	0.154052
ENSG00000273496	AC011841.1	0.192111	0.233446	0.202075	0.230103	0.187171	0.235379
ENSG00000254051	AC011853.1	0	0	0	0	0	0
ENSG00000181511	AC011890.1	0	0	0	0	0	0
ENSG00000278317	AC011890.2	0	0	0	0	0	0
ENSG00000271253	AC011891.2	0	0	0.469951	0	0	0
ENSG00000271586	AC011894.1	0.0706835	0	0	0	0	0
ENSG00000260445	AC011904.1	0	0	0	0	0	0
ENSG00000267678	AC011921.2	0	0	0	0	0	0
ENSG00000270553	AC011921.3	0	0	0.268764	0	0	0
ENSG00000228007	AC011933.1	0	0	0	0.340448	0	0
ENSG00000259924	AC011939.1	0.0482142	0.183951	0.107027	0.211937	0.197377	0
ENSG00000253555	AC011978.1	0.0282104	0	0	0	0	0
ENSG00000239470	AC011979.1	0.170758	0.406767	0.19166	0	0.542559	0
ENSG00000255463	AC011979.2	0	0	0	0	0	0
ENSG00000227241	AC011998.1	0	0	0	0	0	0
ENSG00000229744	AC011998.2	0	0	0	0	0	0
ENSG00000214070	AC011999.1	0	0	0	0	0	0
ENSG00000279274	AC012005.1	0	0	0	0	0	0
ENSG00000284071	AC012005.2	0	0	0	0	0	0
ENSG00000270434	AC012044.1	0	0	0	0	0	0
ENSG00000233416	AC012065.2	0.390493	0.509938	109246	0.428472	0.414036	0.441842
ENSG00000279307	AC012065.5	0	0.151415	0	0	0	0
ENSG00000213197	AC012066.1	0	0	0	0	0.0999588	0.107111
ENSG00000231722	AC012075.1	0	0	0	0	0	0
ENSG00000218410	AC012078.1	0.0482899	0	0	0	0	0.054469
ENSG00000186076	AC012085.1	0	0	0	0.396359	0	0
ENSG00000241130	AC012100.1	0	0	0	0.29951	0	0
ENSG00000271118	AC012119.1	0	0	0	0	0	0
ENSG00000243355	AC012123.2	0.315465	0	0	0.342933	0.330996	0
ENSG00000262495	AC012146.2	0	0.135142	0	0	0.218604	0
ENSG00000262855	AC012146.4	0	0	0	0	0.224972	0
ENSG00000243024	AC012158.1	292133	295183	300645	252215	240644	346157
ENSG00000256192	AC012158.2	0	0.0693368	0.156861	0	0.228667	0
ENSG00000242737	AC012170.1	0.118585	0	0	0.262959	0	0.271765
ENSG00000270440	AC012175.1	0	0	0	0	0	0
ENSG00000243988	AC012181.1	0	0.128484	0	0	0	0
ENSG00000261151	AC012182.1	0	0	0	0	0	0
ENSG00000260537	AC012184.2	213294	426206	421923	233345	434004	500155
ENSG00000260909	AC012186.1	0	0	0	0	0	0
ENSG00000267228	AC012254.2	318215	18487	402118	26852	431705	432552
ENSG00000267800	AC012254.4	0.309156	0.417102	0	0.344205	0	0.346978
ENSG00000204399	AC012306.1	0	0	0	0	0	0
ENSG00000235742	AC012308.1	0	0	0	0	0	0
ENSG00000267360	AC012309.1	0.850161	0.753106	0	0.256654	0	0.21588
ENSG00000273642	AC012314.1	110539	102941	119968	107531	136782	125203
ENSG00000276766	AC012314.10	110539	102941	119968	107531	136782	125203
ENSG00000277722	AC012314.11	110539	102941	119968	107531	136782	125203
ENSG00000278365	AC012314.12	110539	102941	119968	107531	136782	125203
ENSG00000273655	AC012314.2	0.122552	0.0521918	0	0	0	0
ENSG00000274359	AC012314.4	110539	102941	119968	107531	136782	125203
ENSG00000275605	AC012314.5	110539	102941	119968	107531	136782	125203
ENSG00000275724	AC012314.6	110539	102941	119968	107531	136782	125203
ENSG00000276206	AC012314.7	0	0	0	0	0	0
ENSG00000276220	AC012314.8	110539	102941	119968	107531	136782	125203
ENSG00000254079	AC012339.2	0	0	0	0	0	0
ENSG00000231848	AC012354.2	0	0	0	0.148949	0	0
ENSG00000227799	AC012358.2	0.607462	0.618466	0.482088	0.635176	0.749726	0.502696
ENSG00000213081	AC012362.1	0	0	0	0	0	0
ENSG00000270354	AC012368.3	0	0	0	0	0	0
ENSG00000253362	AC012400.1	0	0	0	0	0	0
ENSG00000258420	AC012414.1	0	0	0	0	0	0
ENSG00000259214	AC012414.2	0	0	0	0	0	0
ENSG00000261048	AC012414.6	0	0	0	0.253988	0	0
ENSG00000274499	AC012414.7	0	0	0	0	0	0
ENSG00000267713	AC012433.1	0	0	0	0	0	0
ENSG00000260103	AC012435.1	628759	643094	590012	488239	635523	520141
ENSG00000227080	AC012441.1	331159	415172	551591	310394	229366	52493
ENSG00000228897	AC012441.2	0.430396	0.496869	0.95475	1154	0.577077	103742
ENSG00000283698	AC012442.3	0.439407	0.517357	0.294967	0.292157	0.184603	0.601612
ENSG00000270776	AC012443.1	0	0	0.383593	0	0	0
ENSG00000203363	AC012454.1	0.0896713	0.177054	0.194016	0.0975846	0.0931167	0.19907
ENSG00000271353	AC012468.1	0	0	0	0	0	0
ENSG00000276828	AC012488.1	0	0	0	0	0.236272	0
ENSG00000271074	AC012491.1	0	0	0	0	0.0856607	0
ENSG00000238029	AC012493.1	0	0	0	0	0	0
ENSG00000269383	AC012493.2	0	0	0	0	0	0
ENSG00000270699	AC012493.3	0	0	0	0	0	0
ENSG00000228374	AC012497.1	0	0	0	0	0	0
ENSG00000213495	AC012498.1	0	0	0	0	0	0
ENSG00000271134	AC012498.2	0	0.104312	0	0	0	0
ENSG00000242575	AC012501.2	0.437941	0.214732	0.302778	0.179817	0.40104	0.0613312
ENSG00000270891	AC012507.3	0	0	0	0	0	0
ENSG00000226539	AC012512.1	0.36464	0.598249	0.303936	0.296249	0.191205	0.30858
ENSG00000236478	AC012513.2	0.130199	0.0855279	0.0725056	0.0718143	0.0685495	0
ENSG00000225662	AC012519.1	0	0	0	0	0	0
ENSG00000273049	AC012531.3	0.860299	0	122696	0.639986	101066	269635
ENSG00000267293	AC012569.1	0.405264	0.352558	0.360754	0.17966	0.113883	0.245296
ENSG00000268922	AC012616.1	0	0.384265	0	0	0	0
ENSG00000213293	AC012618.1	0.248538	0.105769	0.349842	0	0	0.367775
ENSG00000234750	AC012618.2	0.108959	0	0.155703	0	0.151444	0.24304
ENSG00000234773	AC012618.3	377071	469738	422744	401441	331257	417427
ENSG00000258461	AC012651.1	0.953146	133243	194014	111457	140514	136938
ENSG00000259477	AC012653.1	0	0	0.0730391	0	0	0
ENSG00000270289	AC012669.1	0	0.186684	0	0	0	0
ENSG00000224291	AC012671.1	0	0	0	0	0	0
ENSG00000275515	AC012676.2	0	0	0.254322	0.255084	0	0
ENSG00000282374	AC012676.6	0	0	0.254322	0.255084	0	0
ENSG00000271018	AC013244.1	0.201227	0.265741	0.90219	0.887484	0.420914	0.450615
ENSG00000271490	AC013244.2	0	0.458901	0	0.739376	0	0
ENSG00000271621	AC013244.3	0	0	0.279514	0	0	0
ENSG00000230897	AC013248.2	0.074819	0	0	0.162769	0.313912	0.168661
ENSG00000233444	AC013262.1	0	0	0	0	0	0
ENSG00000237953	AC013267.1	0	0	0	0	0	0
ENSG00000186148	AC013268.1	0.108944	0.276431	0.119328	0.409517	0.0711906	0.501831
ENSG00000229730	AC013268.2	0	0	0	0	0	0
ENSG00000235721	AC013268.3	0.0300406	0	0	0	0	0
ENSG00000283283	AC013268.4	0	0	0.0253618	0.329095	0.474636	0.371662
ENSG00000184761	AC013269.1	0	0	0	0	0	0
ENSG00000284337	AC013271.1	0.0298741	0.203531	0.318999	0.0686385	0.11604	0.0689453
ENSG00000225185	AC013283.1	0.0708681	306037	0	0.309043	0.296605	0
ENSG00000267585	AC013290.1	0	0	0	0	0	0
ENSG00000260036	AC013355.1	0.0567711	0	0.123126	0	0	0
ENSG00000244251	AC013356.1	0.0739805	0	0	0	0	0
ENSG00000279765	AC013394.1	102421	917982	864745	930833	821489	82671
ENSG00000232723	AC013399.1	0	0	0	0	0	0
ENSG00000236099	AC013403.1	0	0	0	0	0	0
ENSG00000231017	AC013404.1	0	0	0	0	0	0
ENSG00000237016	AC013410.1	0	0	0	0	0	0
ENSG00000237617	AC013410.2	0	0	0	0	0	0
ENSG00000274365	AC013412.1	0	0	0	0	0	0
ENSG00000234658	AC013429.1	0	0	0	0	0	0
ENSG00000234995	AC013429.2	0	0	0	0	0	0
ENSG00000284167	AC013437.2	0	0	0	0	0	0
ENSG00000233996	AC013439.1	0	0.136369	0.157196	0	0.145453	0.157083
ENSG00000196085	AC013442.1	0	0	0	0	0	0
ENSG00000229781	AC013444.1	0	0	0	0	0.0472638	0
ENSG00000270390	AC013444.2	0	0	0	0	0	0
ENSG00000259545	AC013452.1	0	0	0	0	0.127205	0
ENSG00000227180	AC013467.1	0	0	0	0	0	0
ENSG00000270799	AC013467.2	0	0.0533954	0	0	0	0
ENSG00000231278	AC013469.1	0	0	0	0	0	0
ENSG00000224667	AC013470.1	0.100791	0.134125	0	0	0	0
ENSG00000226690	AC013470.2	0.292394	0.103815	0.351398	0.459518	0	0.0537562
ENSG00000236048	AC013470.3	0.0394093	0.0529014	0	0	0	0.0901459
ENSG00000274970	AC013470.4	0	0	0	0	0	0
ENSG00000235128	AC013474.1	0.142798	0.185083	0	0.105202	0.100076	0.214962
ENSG00000278083	AC013476.2	0	0	0	0.21682	0	0
ENSG00000254579	AC013488.1	0.0894082	0.176793	0.203271	0.148707	0.0576196	0
ENSG00000259569	AC013489.2	0	0	0	0	0	0
ENSG00000259258	AC013553.1	0.150972	0.602838	0	0.333328	0.635345	0.677419
ENSG00000270218	AC013553.2	0	0	0.352735	0.17139	0.161948	0
ENSG00000278193	AC013562.2	0	0	0	0	0	0
ENSG00000260275	AC013565.2	0	0	0	0	0	0
ENSG00000253560	AC013643.1	0	0	0	0	0	0
ENSG00000233109	AC013701.1	0	0	0	0	0	0
ENSG00000277146	AC013734.1	0	0	0	0	0	0
ENSG00000262892	AC013759.1	0	0.00015408	0	0	0.000110126	0
ENSG00000241362	AC013787.1	0.629216	0.162724	0.563378	0.834975	105842	0.85566
ENSG00000240454	AC013828.1	0	0	0	0	0.541172	0
ENSG00000255088	AC013828.2	0	0	0	0	0	0
ENSG00000242945	AC015524.1	0	0	0	0	0	0
ENSG00000263604	AC015688.1	0	0	0	0	0	0
ENSG00000264689	AC015688.2	0	0	0	0	0	0
ENSG00000265041	AC015688.3	0	0	0	0	0.0694465	0
ENSG00000266728	AC015688.5	0.250951	0	0	0	0.46143	0
ENSG00000266771	AC015688.6	0	0	0	0.569016	0	0
ENSG00000266853	AC015688.7	0.341429	0.373365	0.127013	0.12578	0.238714	0
ENSG00000255387	AC015689.2	0	0.0329653	0	0	0	0
ENSG00000259586	AC015712.3	0	0	0	0	0	0
ENSG00000260483	AC015720.1	0	0	0	0	0	0
ENSG00000261813	AC015720.2	0	0	0	0.474631	0	0
ENSG00000243058	AC015724.1	0	0	0	0	0	0
ENSG00000253208	AC015743.1	0.263858	0	0.194789	0	0	0
ENSG00000235183	AC015795.1	0	0	0	0.254674	0	0
ENSG00000267376	AC015801.1	0	0	0	0	0	0.540102
ENSG00000267084	AC015802.2	0	0	0	0	0	0
ENSG00000284526	AC015802.6	112491	100602	106616	133281	13.99	125766
ENSG00000266086	AC015813.2	256796	214951	214308	235976	253458	219025
ENSG00000230339	AC015818.1	0	0	0	0	0	0
ENSG00000263946	AC015818.3	0	0.14606	0	0	0.78319	0.204724
ENSG00000264981	AC015818.5	0.0774416	0.201572	0.168477	0.334514	0	0.173457
ENSG00000265916	AC015818.6	0.481092	0.250024	0.514477	0.521998	0.306099	0.329605
ENSG00000266042	AC015818.7	0	0	0	0	0.904081	0
ENSG00000240298	AC015820.1	0	0	0	0	0	0
ENSG00000271268	AC015849.6	0	0	0	0	0	0
ENSG00000282115	AC015849.8	0	0	0	0	0	0
ENSG00000239689	AC015864.1	0	0	0	0	0	0
ENSG00000259770	AC015871.1	0	0	0	0	0	0
ENSG00000271364	AC015871.2	0	0	0	0	0	0
ENSG00000240813	AC015908.1	0	0	0	0	0	0
ENSG00000265460	AC015910.1	0	0.21198	0	0.356291	0.228177	0.122193
ENSG00000242660	AC015911.1	0	0	0	0	0	0
ENSG00000267312	AC015911.4	0	0	0	0	0	0
ENSG00000267369	AC015911.7	0	0	0	0	0	0
ENSG00000267554	AC015911.8	0	0	0	0	0	0
ENSG00000262408	AC015912.2	0	0.218993	0	0	0	0
ENSG00000275785	AC015914.2	0	0	0	0	0	0
ENSG00000263870	AC015917.1	0	0	0	0	0	0
ENSG00000227790	AC015922.1	0	0.0383302	0	0	0	0
ENSG00000233090	AC015922.2	0.479408	0.457695	0	0	0	0
ENSG00000225024	AC015977.1	0.129317	0	0	0	0	0
ENSG00000283076	AC015978.1	0	0	0	0	0	0
ENSG00000213302	AC015983.1	0.100836	0	0	0	0	0
ENSG00000235617	AC016027.4	0	0	0	0	0	0
ENSG00000236890	AC016027.5	0.15644	0.203236	0.667157	0	0	0
ENSG00000253550	AC016065.2	0	0	0	0	0	0
ENSG00000257680	AC016144.1	0	0.0987877	0	0	0	0
ENSG00000261077	AC016180.1	0	0	0	0	0	0
ENSG00000267770	AC016182.1	0	0	0	0	0	0
ENSG00000257287	AC016256.1	0	0	0	0	0	0
ENSG00000275997	AC016292.2	0	0.0876835	0	0	0	0
ENSG00000243122	AC016304.1	0	0	0	0	0	0
ENSG00000231906	AC016397.1	0	0	0	0	0	0
ENSG00000282489	AC016482.1	0.0321101	0	0	0	0	0.071281
ENSG00000282532	AC016482.2	0.0372679	0	0	0.0402151	0.0776696	0
ENSG00000256358	AC016489.1	0	0	0	0	0	0
ENSG00000243744	AC016546.1	0	0	0	0	0	0
ENSG00000249829	AC016559.1	0	0	0	0	0	0
ENSG00000250330	AC016559.2	0	0	0	0	0	0
ENSG00000225868	AC016582.1	367068	209274	357483	173958	199581	209989
ENSG00000267422	AC016582.2	326323	278224	353399	212521	29343	255014
ENSG00000267640	AC016582.3	180741	184037	18227	135237	157834	161222
ENSG00000264281	AC016596.1	0	0	0	0	0	0
ENSG00000251591	AC016612.1	0	0.129675	0	0	0	0
ENSG00000268784	AC016629.1	0	0	0	0	0	0
ENSG00000269032	AC016629.2	0	0	0	0	0	0
ENSG00000251368	AC016632.1	0	0	0	0	0	0
ENSG00000243592	AC016638.1	0	0	0	0	0	0
ENSG00000239983	AC016687.1	0	0	0	0	0	0
ENSG00000233741	AC016691.1	0	0	0	0	0	0
ENSG00000224917	AC016694.1	0	0	0	0	0	0
ENSG00000233335	AC016696.1	0	0	0	0	0	0
ENSG00000225392	AC016700.1	0	0.144052	0	0	0	0
ENSG00000231414	AC016700.2	0	0	0	0	0	0
ENSG00000235225	AC016712.1	0	407239	0	0	0.211537	0
ENSG00000223427	AC016716.1	0	0.086839	0	0	0	0
ENSG00000228206	AC016717.1	229376	226243	288826	383065	120674	422671
ENSG00000232090	AC016724.1	0	0	0	0	0	0
ENSG00000271243	AC016727.2	0	0	0	0	0	0
ENSG00000228305	AC016734.1	0.0674049	0	0	0	0	0
ENSG00000218175	AC016739.1	0.106328	0.945846	0	0.225278	0.220594	0
ENSG00000213642	AC016769.1	0	0	0	0	0.0698261	0
ENSG00000224669	AC016769.2	0	0.116031	0	0	0	0
ENSG00000235349	AC016769.3	0	0	0	0	0.28526	0.30685
ENSG00000276475	AC016769.4	0	0	0	0	0	0
ENSG00000226072	AC016772.1	0.0775093	0	0	0	0	0
ENSG00000229858	AC016831.2	0	0	0	0	0	0
ENSG00000232716	AC016831.3	0	0	0.0509759	0	0	0
ENSG00000240680	AC016831.4	0	0	0	0	0	0
ENSG00000266227	AC016839.1	0	0.123774	0	0	0	0
ENSG00000253415	AC016877.2	0.0334952	0	0	0	0	0
ENSG00000268080	AC016885.3	0	0	0	0	0.267581	0
ENSG00000234624	AC016894.1	0	0	0	0	0.223017	0
ENSG00000225943	AC016907.1	0	0	0	0	0	0
ENSG00000228225	AC016908.1	0	0	0	0	0	0
ENSG00000228721	AC016909.1	0	0	0	0	0	0
ENSG00000276829	AC016911.1	0	0	0	0	0	0
ENSG00000227505	AC016925.1	0	0.196316	0	0	0	0
ENSG00000271175	AC016925.2	0	0	0	0	0	0
ENSG00000223738	AC016930.1	0	0.0220377	0	0	0	0
ENSG00000258134	AC016954.1	0	0.17253	0	0	0.182407	0.0975739
ENSG00000256070	AC016956.1	0	0	0	0	0	0
ENSG00000257094	AC016957.1	0	0	0	0	0	0
ENSG00000275866	AC016991.1	0	0	0	0	0	0
ENSG00000274346	AC016999.2	0.0644018	0	0	0	0	0.145561
ENSG00000271635	AC017002.4	0.0871126	0	0	0	0	0
ENSG00000228814	AC017007.1	0.0907797	0	0	0.202583	0.766108	0.20694
ENSG00000234841	AC017007.2	0.0656346	0.0430268	0.074473	0	0	0.148863
ENSG00000241002	AC017007.3	0	0.117393	0	0.1947	0	0
ENSG00000250500	AC017007.4	0	0	0	0.0753714	0	0
ENSG00000250076	AC017013.1	0	0.0664039	0	0	0	0
ENSG00000240404	AC017015.1	0	0	0	0	0.312884	0
ENSG00000232617	AC017019.1	0	0	0	0	0	0
ENSG00000224442	AC017035.1	0.0685576	0	0	0	0.0720068	0
ENSG00000249627	AC017037.1	0	0	0	0	0	0
ENSG00000250475	AC017037.2	0.0442755	0	0	0	0	0
ENSG00000233829	AC017078.1	0	0	0	0	0	0.239085
ENSG00000185631	AC017079.1	0	0.346524	0.195816	0.194057	0.18486	0.197443
ENSG00000238180	AC017079.2	0.162683	0.105781	0.182313	0.36091	0.171243	0.183243
ENSG00000180105	AC017081.1	0	0	0	0	0	0
ENSG00000283169	AC017081.2	0	0	0	0	0	0
ENSG00000284091	AC017081.3	185688	15195	272536	190717	134118	251084
ENSG00000284220	AC017081.4	155927	138648	177024	205398	171922	254968
ENSG00000284455	AC017081.5	124603	119716	116584	149452	142177	139528
ENSG00000236259	AC017083.1	0	0	0	0	0	0
ENSG00000273398	AC017083.4	0.261563	0.202243	0	0.436334	0.245552	174083
ENSG00000235833	AC017099.1	0.393201	0.454289	0.229293	0.442404	0.208413	0.22406
ENSG00000263772	AC017100.2	0	0	0	0	0	0
ENSG00000230047	AC017104.2	0	0	0	0	0	0
ENSG00000283312	AC017104.4	223858	194498	147718	192757	187369	173454
ENSG00000283491	AC017104.5	26236	201109	173638	12327	14569	141172
ENSG00000266184	AC018371.2	0	0	0	0	0	0
ENSG00000226836	AC018437.1	0	0	0	0	0	0
ENSG00000235683	AC018442.1	0.0157927	0.0608479	0	0	0.0330842	0
ENSG00000253912	AC018442.3	0	0	0	0	0	0
ENSG00000257237	AC018448.1	0	0	0	0	0	0
ENSG00000257586	AC018448.2	0	0	0	0	0	0
ENSG00000271657	AC018462.2	0	0	0	0	0	0
ENSG00000230154	AC018463.1	0	0	0	0	0	0
ENSG00000241556	AC018475.1	0.604446	116879	0	0	147967	0.704706
ENSG00000262560	AC018512.1	0.101047	0	0.287573	0	0.380289	0.246767
ENSG00000255074	AC018523.1	0	0	0	0	0	0
ENSG00000256206	AC018523.2	442699	567557	167753	104528	531014	297538
ENSG00000260438	AC018552.1	0.0901312	0	0	0.0984399	0.0942659	0
ENSG00000260828	AC018552.3	0.134115	0.0873264	0	0	0.141699	0.306915
ENSG00000261590	AC018554.2	0	0	0	0	0	0
ENSG00000278499	AC018554.3	0.117379	0	0.142622	0	0.146169	0.234868
ENSG00000259844	AC018555.1	0	0	0	0	0	0
ENSG00000278681	AC018558.4	0	0	0	0	0	0
ENSG00000282946	AC018558.5	0	0.0479054	0	0	0	0
ENSG00000271195	AC018618.2	0	0	0	0	0	0
ENSG00000254273	AC018620.1	0	0.255407	0	0.211653	0	0
ENSG00000256019	AC018630.1	0	0	0	0	0.0497754	0
ENSG00000256274	AC018630.2	0.104919	0.194974	0.0243161	0.11772	0.132601	0.0477049
ENSG00000256400	AC018630.3	0	0	0	0	0	0
ENSG00000263083	AC018630.4	0.104919	0.194974	0.0243161	0.11772	0.132601	0.0477049
ENSG00000263158	AC018630.5	0	0	0	0	0.0497754	0
ENSG00000275778	AC018630.6	0	0	0	0	0	0
ENSG00000225314	AC018634.1	0	0	0	0	0	0
ENSG00000242261	AC018635.1	287625	306657	168277	338813	283542	253197
ENSG00000229413	AC018638.1	136687	289898	25067	248521	194539	103538
ENSG00000230715	AC018638.2	684932	10064	840236	74641	543481	792965
ENSG00000241493	AC018638.3	0.578306	0.755513	0.641542	0	12123	0.64609
ENSG00000243302	AC018638.4	148102	174907	144199	108662	150588	161207
ENSG00000243679	AC018638.5	480902	603218	65567	581002	491124	692614
ENSG00000281896	AC018638.8	0.493035	0.646431	185419	111022	0.34886	0
ENSG00000242162	AC018639.1	0	0	0	0	0	0
ENSG00000226468	AC018641.1	0.319567	0.77546	0.202984	0.495037	0.381225	0.102033
ENSG00000229677	AC018644.1	0	0	0	0.30794	0	0.158328
ENSG00000250756	AC018645.1	0	0	0	0	0	0
ENSG00000256480	AC018653.2	0	0	0	0	0	0
ENSG00000257157	AC018659.1	0	0	0	0	0	0
ENSG00000283443	AC018688.1	186162	153934	155286	10462	168443	157829
ENSG00000279783	AC018692.2	0	0	0	0	0	0
ENSG00000280075	AC018692.3	0	0	0	0	0	0
ENSG00000232114	AC018693.2	0	0.0995073	0	0	0	0
ENSG00000214259	AC018695.1	0	0	0	0	0	0
ENSG00000270698	AC018695.5	0	0	0	0	0	0
ENSG00000272297	AC018709.1	0	0	0	0	0.128778	0
ENSG00000250839	AC018710.1	0	0	0	0	0	0
ENSG00000230104	AC018712.1	0.0495326	0	0	0.108499	0	0.11138
ENSG00000271509	AC018714.1	0	0	0	0	0	0
ENSG00000230407	AC018717.1	0	0	0	0	0	0
ENSG00000226553	AC018735.1	0	0	0	0	0	0
ENSG00000270798	AC018737.1	0	0	0	0	0.328938	0
ENSG00000237039	AC018738.1	0.00117035	0	0	0	0	0
ENSG00000268500	AC018755.2	0.0163916	0.0210765	0.0352796	0.0356336	0.034427	0
ENSG00000269388	AC018755.3	189265	201275	327623	271672	234448	196902
ENSG00000283980	AC018761.5	0	0.29665	0.441024	0.20723	0.416785	0.345919
ENSG00000283873	AC018793.1	0	0	0	0	0	0
ENSG00000284018	AC018793.2	0	0	0	0	0	0
ENSG00000284306	AC018793.3	0	0	0	0	0	0
ENSG00000284438	AC018793.4	0	0	0	0	0	0
ENSG00000284546	AC018793.5	0	0	0	0.132662	0.127652	0
ENSG00000224207	AC018797.1	0.125435	0	0.27811	0	0	0.574158
ENSG00000251288	AC018797.3	0	0.08523	0	0	0	0
ENSG00000227632	AC018804.1	178002	0.915439	0.288019	181053	122014	131101
ENSG00000259983	AC018845.2	0	0	0	0	0	0
ENSG00000259864	AC018846.1	0	0	0	0	0	0
ENSG00000253975	AC018861.1	0	0	0	0	0.0484411	0
ENSG00000228471	AC018865.2	0	0.479635	0	0	0	0
ENSG00000231409	AC018868.1	0.120104	0	0.529664	0.526322	0	0
ENSG00000259751	AC018868.2	0.0550265	0.0357343	0.0607998	0	0.0575849	0.0618053
ENSG00000221849	AC018880.1	0	0	0	0	0	0
ENSG00000231723	AC018880.2	0	0	0	0	0	0
ENSG00000271146	AC018889.1	0	0.13338	0	0	0.215587	0
ENSG00000230343	AC018892.1	0	0	0	0	0	0
ENSG00000236847	AC018892.2	0	0	0	0	0.121005	0
ENSG00000253336	AC018992.1	0.116409	0.179806	0	0.0857649	0.0816946	0.0440281
ENSG00000233428	AC019050.1	0.0728824	0	0	0.158469	0.151957	0.163052
ENSG00000224007	AC019070.1	0	0	0	0	0	0
ENSG00000271639	AC019072.1	0.102426	0.033519	0.0578282	0.056636	0.107973	0.0580354
ENSG00000237178	AC019080.2	0	0	0	0	0	0
ENSG00000228030	AC019084.1	0.0876074	0	0	0	0	0
ENSG00000231822	AC019097.1	118768	125676	132357	10786	0.847961	189549
ENSG00000224826	AC019109.1	0	0.0247813	0.141617	0	0.0397754	0
ENSG00000283321	AC019117.3	0.47806	0.126571	0.131158	0.404322	0	0.993075
ENSG00000219391	AC019129.1	0	0	0	0	0	0
ENSG00000205898	AC019155.1	227587	248753	149498	14478	257654	149091
ENSG00000270815	AC019159.1	0	0	0	0	0	0
ENSG00000281154	AC019173.1	0	0	0	0	0	0
ENSG00000253262	AC019176.1	0	0	0	0	0	0
ENSG00000273876	AC019176.2	0	0	0	0	0	0
ENSG00000213110	AC019178.1	0	0	0	0	0	0
ENSG00000223824	AC019178.2	0	0	0	0.225491	0	0
ENSG00000224331	AC019181.1	0	0	0	0	0	0
ENSG00000227430	AC019185.1	0	0	0	0	0	0
ENSG00000232409	AC019185.3	0	0	0	0	0	0
ENSG00000250636	AC019193.1	0	0.0605537	0	0	0	0
ENSG00000224221	AC019205.1	0	0	0	0	0	0
ENSG00000235174	AC019205.3	0	0	0	0	0	0
ENSG00000275381	AC019206.1	0.58319	128255	109899	0.856089	0.204088	0.442235
ENSG00000255358	AC019227.1	0	0	0	0	0	0
ENSG00000248770	AC019235.1	0	0	0	0	0	0
ENSG00000259688	AC019288.1	0	0	0	0	0	0
ENSG00000187812	AC019294.1	0	0.0215306	0	0	0	0
ENSG00000260815	AC019294.3	0	0	0	0	0.150946	0
ENSG00000263070	AC019322.1	0	0	0	0	0	0
ENSG00000271333	AC019322.2	0	0	0	0	0	0
ENSG00000274966	AC019322.3	0.639316	0.88897	114708	0.67269	0.614084	0.4124
ENSG00000256674	AC020549.1	0	0.0676164	0	0	0	0
ENSG00000270204	AC020549.2	0	0	0	0	0	0
ENSG00000231699	AC020550.1	0	0	0	0	0	0
ENSG00000251334	AC020593.1	0	0	0	0	0.251581	0
ENSG00000255780	AC020611.1	0	0	0	0	0	0
ENSG00000257243	AC020612.1	0.620894	0.448395	0.153679	0.150576	0.724465	0.622892
ENSG00000257570	AC020612.2	0	0	0	0	0	0
ENSG00000257674	AC020629.1	0	0.0280127	0	0	0	0
ENSG00000240890	AC020633.1	0	0.0542218	0.0469734	0.0454561	0.0429685	0
ENSG00000260234	AC020636.2	0	0	0	0	0	0.215466
ENSG00000244705	AC020658.1	0	0	0	0	0	0
ENSG00000259405	AC020661.2	0.820695	0	0	180081	0	0
ENSG00000281622	AC020679.2	0	0	0	0	0	0
ENSG00000224722	AC020688.1	0	0	0	0	0	0
ENSG00000248750	AC020699.1	0	0.161449	0	0	0	0
ENSG00000271410	AC020728.1	0	0.108808	0	0	0.0581567	0
ENSG00000271495	AC020765.1	0	0	0	0	0	0
ENSG00000278665	AC020765.3	0	0	0.0833515	0	0	0
ENSG00000278725	AC020765.4	0	0.200285	0	0	0	0
ENSG00000243568	AC020779.1	0.339973	0.251443	0.234578	0.847213	0	0.594475
ENSG00000174715	AC020890.1	0.0698913	0.185133	0	0	0.146355	0
ENSG00000270378	AC020891.4	0	0	0	0	0	0
ENSG00000248930	AC020893.1	0	0	0	0	0	0
ENSG00000251467	AC020893.2	0	0.124897	0	0	0	0
ENSG00000269385	AC020895.1	0	0	0	0	0	0
ENSG00000213757	AC020898.1	0.32935	0.57444	0.366171	0.723819	0.460017	0.741064
ENSG00000242858	AC020899.1	0	0.0711893	0	0	0	0
ENSG00000268623	AC020904.1	0	0.0585748	0	0	0	0
ENSG00000273654	AC020904.2	0.318782	0.694197	0.353634	0.496882	0.239422	0.275169
ENSG00000142539	AC020909.1	0	0	0	0	0	0
ENSG00000270281	AC020910.2	0	0	0	0	0	0
ENSG00000271049	AC020910.3	0.124627	0.215621	0.183682	0.09172	0.348898	0.094554
ENSG00000213822	AC020914.1	0	0.0274247	0	0	0	0
ENSG00000268839	AC020914.3	0	0	0	0	0	0
ENSG00000268957	AC020914.4	0	0	0	0	0	0
ENSG00000269130	AC020914.5	0	0	0	0	0	0
ENSG00000269181	AC020914.6	0	0	0	0	0	0
ENSG00000269580	AC020914.7	0	0	0	0	0.116535	0
ENSG00000142396	AC020915.1	479783	463519	514401	493723	485603	474379
ENSG00000267216	AC020915.2	0.305352	0.517053	0.186627	0.296776	0.307924	0.636132
ENSG00000268866	AC020915.5	0.138903	0.179785	0.105521	0.413138	0	0
ENSG00000283515	AC020915.6	427162	410558	520903	201435	325312	499163
ENSG00000240418	AC020917.1	0.0342942	0.088627	0.0733958	0	0	0.152598
ENSG00000267706	AC020922.1	0.416119	0.333619	0.211273	0	0	0.360363
ENSG00000284491	AC020934.3	0.0925628	0	0	0	0	0
ENSG00000214890	AC020937.1	0.0401514	0	0	0	0	0
ENSG00000240435	AC020978.1	0.317378	0	0	0	0	0
ENSG00000243099	AC020983.1	0	0.0989133	0	0	0	0
ENSG00000254185	AC021001.1	0.0477542	0.124024	0	0	0	0
ENSG00000242729	AC021006.1	0	0	0	0	0	0
ENSG00000255563	AC021006.3	0.570079	0.484041	123963	0	118564	0.425951
ENSG00000230580	AC021016.1	0.0685334	0	0.299974	0	0	0.153985
ENSG00000283536	AC021072.1	0.623568	0.500882	0.249492	0.509859	0.364167	0.383086
ENSG00000240950	AC021074.1	0	0	0	0	0	0
ENSG00000241592	AC021074.2	0.722584	0.46403	117635	0	0.376778	0
ENSG00000250848	AC021087.2	0.694458	121271	0.31065	0.318095	0.704156	0.511454
ENSG00000249863	AC021106.1	0.43235	0.51963	0.807469	1398	165743	143481
ENSG00000251332	AC021106.2	0.137656	0.120127	0	0	0	0
ENSG00000198277	AC021146.1	0	0	0	0	0	0
ENSG00000251498	AC021146.10	0	0	0	0	0	0
ENSG00000251529	AC021146.11	0	0	0	0	0	0
ENSG00000280504	AC021146.13	0	0	0	0	0	0
ENSG00000280525	AC021146.14	0	0.036982	0	0	0	0
ENSG00000281510	AC021146.15	0	0	0	0	0	0
ENSG00000248547	AC021146.2	0	0	0	0	0	0
ENSG00000248613	AC021146.3	0	0	0	0	0	0
ENSG00000249235	AC021146.4	0	0	0	0	0	0
ENSG00000249735	AC021146.5	0	0	0	0	0	0
ENSG00000249985	AC021146.6	0	0	0	0	0	0
ENSG00000250277	AC021146.7	0	0.036982	0	0	0	0
ENSG00000251236	AC021146.8	0	0	0	0	0	0
ENSG00000251424	AC021146.9	0	0	0	0	0	0
ENSG00000224097	AC021148.1	107126	143959	1353	115905	115978	106071
ENSG00000270528	AC021171.1	0	0.260323	0	0	0.139986	0.304395
ENSG00000270846	AC021171.2	0	0.0396443	0	0	0	0
ENSG00000248921	AC021193.1	0	0	0	0	0	0
ENSG00000240775	AC021205.1	0	0	0	0.233598	0	0
ENSG00000244083	AC021205.2	0	0	0	0	0	0
ENSG00000250812	AC021220.1	0	0	0	0	0	0
ENSG00000259397	AC021231.2	0.0475162	0.0615157	0	0	0	0
ENSG00000259665	AC021231.3	0.238764	0.157123	0	0	0.758052	0.271283
ENSG00000249050	AC021242.1	0	0	0	0	0	0
ENSG00000254583	AC021269.1	0	0	0	0	0	0
ENSG00000255401	AC021269.2	0	0	0	0	0	0
ENSG00000254294	AC021305.1	0.0424087	0.0283861	0	0	0	0
ENSG00000244329	AC021382.1	0	0	0	0	0	0
ENSG00000271543	AC021443.1	0.197101	0	0	0	0	0.449589
ENSG00000228984	AC021451.1	0	0	0	0	0	0
ENSG00000275827	AC021506.2	0	0	0	0	0	0
ENSG00000270506	AC021646.1	0	0	0	0	0	0
ENSG00000240827	AC021660.1	0	0	0	0	0	0
ENSG00000250516	AC021678.1	0	0.353991	0.102189	0.0985811	0	0.10055
ENSG00000253907	AC021678.3	0	0	0	0	0.135772	0
ENSG00000240975	AC021723.1	0	0	0	0	0.131301	0
ENSG00000254037	AC021733.2	0	0	0	0.161678	0	0
ENSG00000259195	AC021739.1	0.178359	0	0	0	0	0
ENSG00000270588	AC021749.1	0	0	0	0	0	0
ENSG00000283133	AC021753.1	0	0	0	0	0	0
ENSG00000259239	AC021755.1	0	0	0	0	0	0
ENSG00000259496	AC021818.2	0	0	0	0	0	0
ENSG00000255347	AC021820.1	0	0	0	0	0	0
ENSG00000232627	AC021876.1	0.111846	0.149167	0	0.245945	0	0
ENSG00000270531	AC022001.1	0	0.170285	0	0	0	0
ENSG00000284073	AC022016.2	421461	40095	31275	378596	41751	408054
ENSG00000234017	AC022018.1	0	793228	0	0.653965	0	0.336129
ENSG00000224412	AC022022.1	0	0	0	0	0.51245	0
ENSG00000270421	AC022022.2	0	0.186193	0	0	0	0.316061
ENSG00000236606	AC022028.1	0	0	0	0	0	0
ENSG00000206144	AC022034.1	0	0.079845	0	0.0449231	0	0
ENSG00000240919	AC022034.3	0	0	0	0	0	0
ENSG00000264911	AC022069.1	0	0.174199	0	0	0	0
ENSG00000203437	AC022080.1	0.245126	0.160613	0.347748	0.233802	0.202449	0
ENSG00000225349	AC022080.2	0.0714552	0.0918735	0	0.154888	0.296774	0.317291
ENSG00000256159	AC022080.3	0	0.117589	0	0	0	0
ENSG00000274235	AC022106.1	0	0	0	0	0	0
ENSG00000277866	AC022106.2	0	0	0	0.126862	0	0
ENSG00000241597	AC022121.1	0.113172	0.146706	0.247545	0	0.118597	0.126544
ENSG00000241809	AC022133.1	0	0	0	0	0	0
ENSG00000241434	AC022137.1	0	0	0	0	0	0
ENSG00000249435	AC022137.2	0	0	0	0	0	0
ENSG00000269458	AC022145.2	0	0	0	0	0	0
ENSG00000269651	AC022146.1	0	0	0	0	0	0
ENSG00000269378	AC022149.1	0	0	0	0	0	0
ENSG00000275432	AC022149.2	0	0	0	0	0	0
ENSG00000283516	AC022167.5	0.233043	0.336914	0.119812	0.266389	0.10745	0.24826
ENSG00000255397	AC022182.3	0.158243	0.137231	0.158336	0.116197	0.111129	0.120968
ENSG00000276650	AC022202.1	0	0	0.0357838	0	0	0
ENSG00000240419	AC022206.1	0	0	0	0	0	0
ENSG00000213399	AC022210.1	0	0.0502834	0.083788	0	0.164132	0
ENSG00000241400	AC022215.1	0	0	0	0	0	0
ENSG00000213386	AC022217.1	0.227239	0.175787	0.38687	0.297433	0	0.100929
ENSG00000270243	AC022217.4	0	0	0	0	0	0
ENSG00000261702	AC022254.1	0	0	0	0	0	0
ENSG00000214301	AC022296.1	0	0	0	0	0	0
ENSG00000250983	AC022296.2	0	0	0	0	0	0
ENSG00000259531	AC022306.1	0.111944	0.0735431	0.0635168	0.124429	0.117187	0
ENSG00000249411	AC022325.1	0	0.0258899	0	0	0.0409798	0
ENSG00000257062	AC022335.1	0	0	0	0	0	0
ENSG00000242199	AC022336.1	0.104394	0.138181	0	0.229763	0.218766	0
ENSG00000253156	AC022360.1	0	0	0	0	0	0
ENSG00000255951	AC022364.2	0.0823406	0.107366	0.189949	0.184161	0	0
ENSG00000272410	AC022384.1	0.402053	0.438645	0	0.990808	0.365341	0.710808
ENSG00000270352	AC022387.2	0	0	0	0	0	0
ENSG00000270808	AC022400.4	0.102848	0.401321	0.223233	0	0	0
ENSG00000272916	AC022400.6	134025	108228	118716	115798	0.947725	128561
ENSG00000258452	AC022404.1	0	0	0	0	0	0
ENSG00000242615	AC022415.1	45884	305323	363368	258689	516186	377613
ENSG00000226221	AC022431.1	0.356285	0.154276	0.264182	18321	0.508529	0
ENSG00000268747	AC022432.1	0.433675	0.38063	0.328317	0.640677	0.306317	0.330695
ENSG00000270830	AC022441.3	0	0	0	0	0	0
ENSG00000248878	AC022447.4	0	0	0	0	0	0
ENSG00000227040	AC022483.1	0	0	0	0.166557	0	0
ENSG00000241250	AC022483.2	0	0.920855	0	0	0	0
ENSG00000244630	AC022493.1	0	0	0.261703	0	0	0
ENSG00000248967	AC022493.2	0	0.116629	0	0	0	0
ENSG00000240477	AC022494.1	0	0	0	0	0	0
ENSG00000257777	AC022507.1	0	0	0	0	0.0517406	0
ENSG00000259266	AC022523.2	0	0	0	0	0	0
ENSG00000253178	AC022559.1	0	0	0	0	0	0
ENSG00000234713	AC022616.1	0	0	0	0	0	0
ENSG00000253186	AC022616.2	0	0	0	0	0	0
ENSG00000253312	AC022616.3	0	0	0	0	0	0
ENSG00000253707	AC022616.4	0	0	0	0	0	0
[truncated: 37,221 more rows]
[truncated: 2 more columns]

## Sheet: Sheet1
	Control				Conditioned Medium
FLG	0.0246715	0.0127886	0.0217387	0.0197329	51.4633	51.7865	58.7978
IVL	0.114659	0.0182525	0	0.0443038	199.573	157.914	189.135
KRT1	0.192472	0.0359028	0.152617	0.126997	171.157	155.412	163.315
KRT4	0.017557	0	0	0.00585233	26.6497	16.5696	19.1887
KRT10	37.2973	37.1412	35.7341	36.7242	274.85	241.232	240.797
KRT14	0.114716	0.159017	0.101336	0.125023	417.887	345.043	352.111
KRTDAP	0.414419	0.0870751	0.586512	0.362669	751.409	629.55	682.87
TGM1	3.87153	3.90394	5.23534	4.33694	67.4687	57.3781	65.8892
				Fold induction
					2607.99	2624.37	2979.68
					13830.1	10943.2	13106.7
					1347.72	1223.74	1285.97
					4553.69	2831.28	3278.81
					7.48417	6.56875	6.5569
					3342.48	2759.84	2816.37
					2071.89	1735.88	1882.9
					15.5568	13.2301	15.1926
